# Supplementary material for: Effect of large-scale disasters on bystander-initiated cardiopulmonary resuscitation in family-witnessed, friend-witnessed and colleague-witnessed out-of-hospital cardiac arrest: a retrospective analysis of prospectively collected, nationwide, population-based data
Source: PubMed Central journal article supplement — BMJ Open. 2022 Feb 1;12(2):e055640. doi: 10.1136/bmjopen-2021-055640 (PMC8808444; doi:10.1136/bmjopen-2021-055640), 2022-02-01
Supplement: bmjopen-2021-055640.draft_revisions.pdf [file bmjopen-2021-055640.draft_revisions.pdf]

# BMJ Open

BMJ Open is committed to open peer review. As part of this commitment we make the peer review history of every article we publish publicly available.

When an article is published we post the peer reviewers' comments and the authors' responses online. We also post the versions of the paper that were used during peer review. These are the versions that the peer review comments apply to.

The versions of the paper that follow are the versions that were submitted during the peer review process. They are not the versions of record or the final published versions. They should not be cited or distributed as the published version of this manuscript.

BMJ Open is an open access journal and the full, final, typeset and author-corrected version of record of the manuscript is available on our site with no access controls, subscription charges or pay-per-view fees (<http://bmjopen.bmj.com>).

If you have any questions on BMJ Open's open peer review process please email [info.bmjopen@bmj.com](mailto:info.bmjopen@bmj.com)

# BMJ Open

**Effect of large-scale disasters on bystander-initiated cardiopulmonary resuscitation in family-, friend-, and colleague-witnessed out-of-hospital cardiac arrest: a retrospective analysis of prospectively collected, nationwide, population-based data of out-of-hospital cardiac arrest cases**

|                               |                                                                                                                                                                                                                                                                                                                                                                                                                                                                                                                                                                                                                                                                                               |
|-------------------------------|-----------------------------------------------------------------------------------------------------------------------------------------------------------------------------------------------------------------------------------------------------------------------------------------------------------------------------------------------------------------------------------------------------------------------------------------------------------------------------------------------------------------------------------------------------------------------------------------------------------------------------------------------------------------------------------------------|
| Journal:                      | <i>BMJ Open</i>                                                                                                                                                                                                                                                                                                                                                                                                                                                                                                                                                                                                                                                                               |
| Manuscript ID                 | bmjopen-2021-055640                                                                                                                                                                                                                                                                                                                                                                                                                                                                                                                                                                                                                                                                           |
| Article Type:                 | Original research                                                                                                                                                                                                                                                                                                                                                                                                                                                                                                                                                                                                                                                                             |
| Date Submitted by the Author: | 19-Jul-2021                                                                                                                                                                                                                                                                                                                                                                                                                                                                                                                                                                                                                                                                                   |
| Complete List of Authors:     | Ushimoto, Tomoyuki; Kanazawa Medical University, Emergency Medicine<br>Takada, Kohei; Kanazawa University Graduate School of Medical Sciences, Department of Circulatory Emergency and Resuscitation Science<br>Yamashita, Akira; Kanazawa University Graduate School of Medical Sciences, Department of Circulatory Emergency and Resuscitation Science; Noto General Hospital, Department of Cardiology<br>Morita, Hideki; Kanazawa Medical University, Department of Emergency Medicine<br>Wato, Yukihiro; Kanazawa Medical University, Emergency medicine<br>Inaba, Hideo; Kanazawa Medical University, Emergency Medicine; Kanazawa Medical University, Department of Emergency Medicine |
| Keywords:                     | ACCIDENT & EMERGENCY MEDICINE, EDUCATION & TRAINING (see Medical Education & Training), MEDICAL EDUCATION & TRAINING, PUBLIC HEALTH                                                                                                                                                                                                                                                                                                                                                                                                                                                                                                                                                           |
|                               |                                                                                                                                                                                                                                                                                                                                                                                                                                                                                                                                                                                                                                                                                               |

SCHOLARONE™  
Manuscripts

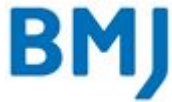

I, the Submitting Author has the right to grant and does grant on behalf of all authors of the Work (as defined in the below author licence), an exclusive licence and/or a non-exclusive licence for contributions from authors who are: i) UK Crown employees; ii) where BMJ has agreed a CC-BY licence shall apply, and/or iii) in accordance with the terms applicable for US Federal Government officers or employees acting as part of their official duties; on a worldwide, perpetual, irrevocable, royalty-free basis to BMJ Publishing Group Ltd ("BMJ") its licensees and where the relevant Journal is co-owned by BMJ to the co-owners of the Journal, to publish the Work in this journal and any other BMJ products and to exploit all rights, as set out in our [licence](#).

The Submitting Author accepts and understands that any supply made under these terms is made by BMJ to the Submitting Author unless you are acting as an employee on behalf of your employer or a postgraduate student of an affiliated institution which is paying any applicable article publishing charge ("APC") for Open Access articles. Where the Submitting Author wishes to make the Work available on an Open Access basis (and intends to pay the relevant APC), the terms of reuse of such Open Access shall be governed by a Creative Commons licence – details of these licences and which [Creative Commons](#) licence will apply to this Work are set out in our licence referred to above.

Other than as permitted in any relevant BMJ Author's Self Archiving Policies, I confirm this Work has not been accepted for publication elsewhere, is not being considered for publication elsewhere and does not duplicate material already published. I confirm all authors consent to publication of this Work and authorise the granting of this licence.

1  
2  
3  
4 **Effect of large-scale disasters on bystander-initiated cardiopulmonary resuscitation in**  
5  
6 **family-, friend-, and colleague-witnessed out-of-hospital cardiac arrest: a retrospective**  
7  
8 **analysis of prospectively collected, nationwide, population-based data of out-of-hospital**  
9  
10 **cardiac arrest cases**  
11  
12  
13  
14  
15  
16  
17  
18

19 Tomoyuki Ushimoto, MD, PhD<sup>1</sup> (0000-0002-9060-9391), Kohei Takada, BA<sup>2</sup>, Akira

20  
21 Yamashita, MD, PhD<sup>2,3</sup>, Hideki Morita, MD<sup>1</sup>, Yukihiro Wato, MD, PhD<sup>1</sup>, Hideo Inaba, MD,  
22  
23  
24  
25 PhD<sup>1,4</sup>  
26  
27  
28  
29

30  
31 <sup>1</sup>Department of Emergency Medicine, Kanazawa Medical University, Uchinada, Japan  
32

33  
34 <sup>2</sup>Department of Circulatory Emergency and Resuscitation Science, Kanazawa University  
35  
36  
37 Graduate School of Medicine, Kanazawa, Japan  
38

39  
40 <sup>3</sup>Department of Cardiology, Noto General Hospital, Nanao, Japan  
41

42  
43 <sup>4</sup>Kanazawa University, Kanazawa, Japan  
44  
45  
46  
47  
48

49 E-mail addresses:

50  
51 TU; ushi@kanazawa-med.ac.jp, KT; tatatakakadadada612@yahoo.co.jp, AY;

52  
53  
54 yamashita@noto-hospital.jp, HM; moririn@p2223.nsk.ne.jp, YW;

55  
56  
57 allstar@kanazawa.med.ac.jp, HI; mauriakoi@ybb.ne.jp  
58  
59  
60

1  
2  
3  
4 \*Address for correspondence:  
5

6 Tomoyuki Ushimoto, MD, PhD, Assistant Professor of Emergency Medicine, Kanazawa  
7

8  
9 Medical University  
10

11  
12 1-1 Daigaku, Uchinada-machi, Kahoku-gun, Ishikawa, 920-0293, Japan  
13  
14

15 Phone: +81-76-218-8445  
16

17  
18 FAX: +81-76-286-1635  
19

20  
21 E-mail: [ushi@kanazawa-med.ac.jp](mailto:ushi@kanazawa-med.ac.jp)  
22  
23

24  
25  
26  
27 Total word count (excluding title, abstract, acknowledgment, references, tables, and figure  
28  
29 legends): 2466  
30  
31

32  
33 Number of Tables: 3  
34

35  
36 Number of Figures: 2  
37

38  
39 Number of Supplementary Tables: 3  
40

41  
42 Number of Supplementary Figures: 1  
43  
44

45  
46 Number of References: 29  
47  
48  
49  
50  
51  
52  
53  
54  
55  
56  
57  
58  
59  
60

## ABSTRACT

**Importance:** The effect of large-scale disasters on bystander cardiopulmonary resuscitation (BCPR) performance is unknown.

**Objective:** To investigate whether and how the large-scale earthquake and tsunami influenced BCPR performance for out-of-hospital cardiac arrest (OHCA) witnessed by family and friends/colleagues.

**Design & Setting:** Retrospective analysis of prospectively collected, nationwide, population-based data for OHCA cases.

**Participants:** From the nationwide OHCA registry recorded between March 11, 2010, and March 10, 2013, we extracted 74,684 family- and friend/colleague-witnessed OHCA cases without prehospital physician involvement.

**Exposure:** The earthquake and Tsunami that were followed by nuclear pollution and largely affected the social life of citizens for at least 24 weeks.

**Main Outcome and Measure:** Neurologically favorable outcome after 1 month, 1-month survival and BCPR.

**Results:** In tsunami-affected prefectures, the 4-week average trend after the day of disaster indicated the impact of the disaster on the BCPR rate during weeks 0–23 (impact phase) in the disaster year 2011, compared with pre- and post-disaster year (2010/2012). Multivariable logistic regression for tsunami-affected prefectures revealed that the BCPR rate during the impact phase in 2011 was significantly lower than that in 2010/2012 (42.5% vs. 48.2%;

1  
2  
3  
4 adjusted odds ratio; 95% confidence interval, 0.82; 0.68–0.99). A lower level of bystander  
5  
6 compliance with dispatcher-assisted CPR instructions (62.1% vs. 69.5%, 0.72; 0.57–0.92) in  
7  
8 the presence of a preserved level of voluntary BCPR performance (23.6% vs. 23.8%) was  
9  
10 also observed. Both 1-month survival and neurologically favorable outcome rates during the  
11  
12 impact phase in 2011 were significantly poorer than those in 2010/2012 (8.5% vs. 10.7%,  
13  
14 0.72; 0.52–0.99, 4.0% vs. 5.2%, 0.62; 0.38–0.98, respectively).  
15  
16  
17  
18  
19  
20  
21

22 **Conclusion and Relevance:** A large-scale disaster with nuclear pollution influences BCPR  
23  
24 performance and clinical outcomes of OHCA witnessed by family and friends/colleagues.  
25  
26 Basic life-support training leading to voluntary-initiated BCPR might serve as preparedness  
27  
28 for disaster and major accidents.  
29  
30  
31  
32

33 (Word count: 299)  
34  
35  
36  
37  
38  
39  
40

### 41 **Strengths and limitations of this study**

42 This study focused on alterations in bystander-initiated and dispatcher-instructed BCPR after  
43  
44 a large-scale disaster.  
45  
46  
47

48 Not only before-after comparisons but also differences in trends were analyzed between  
49  
50 tsunami-affected and -unaffected prefectures using a large nationwide database.  
51  
52  
53

54 The catastrophe occurred in the seacoast areas of some of the prefectures, but the analyses  
55  
56 were performed after dividing the prefectures.  
57  
58  
59

60 Bystander-specific data, such as age, sex, and training experience were not included in the

1  
2  
3  
4 database and therefore not available for study.  
5  
6

7 No research was conducted on whether the bystanders were actually psychologically affected.  
8  
9  
10  
11  
12  
13  
14  
15  
16  
17  
18  
19  
20  
21  
22  
23  
24  
25  
26  
27  
28  
29  
30  
31  
32  
33  
34  
35  
36  
37  
38  
39  
40  
41  
42  
43  
44  
45  
46  
47  
48  
49  
50  
51  
52  
53  
54  
55  
56  
57  
58  
59  
60

For peer review only



## Introduction

The Great East Japan Earthquake swept the North-East Pacific coast of the Japanese mainland on March 11, 2011, and an earthquake-generated tsunami destroyed cities, towns, and villages located at the North-East Pacific coast, resulting in the Fukushima Dai-ichi nuclear accident. This disaster forced citizens in afflicted areas to spend a long period as evacuees.<sup>1,2</sup> A considerable number of major aftershocks with and without a tsunami warning (moment magnitude  $\geq 6.0$ ) occurred for 24 weeks after the main disaster (Supplemental Figure, upper panel).<sup>3</sup> After evacuation of survivors living in tsunami-affected areas, more than 15,000 people lived temporarily in “shelters” and eventually moved into temporary housing areas, leaving their hometowns. The search for missing people continued for 24 weeks after the disaster. The final number of victims on June 10, 2020 was 22,167, comprising of 19,638 fatalities, which included 3,739 disaster-related deaths and 2,529 missing people (Supplemental Figure, middle panel).<sup>2</sup> Several emergency fire response teams and volunteers provided disaster services in the tsunami-affected prefectures (Supplemental Figure, lower panel). Reconstruction of the destroyed towns and cities with resumption of farming and fishery industries began only around 24 weeks after the disaster.<sup>4</sup> Several aspects of this disaster have been reviewed over the past 10 years following the disaster.<sup>2</sup>

Large-scale disasters or catastrophes may psychologically affect the social behavior of citizens.<sup>5,6</sup> Disasters are known to temporally increase the incidence of cardiovascular events and other acute illnesses that may lead to out-of-hospital cardiac arrest (OHCA).<sup>7-9</sup>

1  
2  
3  
4 The outcomes of OHCA depend on dispatcher-assisted and bystander-initiated resuscitation  
5  
6 efforts and on initial basic life-support (BLS) actions by bystanders who witness OHCA.<sup>10</sup>  
7  
8

9  
10 The Fukushima nuclear pollution disaster and the large-scale pandemic such as coronavirus  
11  
12 disease 2019 (COVID-19) may augment the level of general fear of pollution and infection in  
13  
14 the population, which might discourage BLS actions<sup>11,12</sup>. However, the impact of large-scale  
15  
16 disasters on BLS actions of laypersons is unknown. This study aimed to investigate whether  
17  
18 and how the 2011 earthquake influenced the bystander cardiopulmonary resuscitation  
19  
20 (BCPR) and outcomes in OHCA cases witnessed by family, friends and colleagues in the  
21  
22 prefectures that were most affected by the earthquake.  
23  
24  
25  
26  
27  
28  
29  
30  
31  
32

### 33 **Methods**

#### 34 *Data selection and grouping*

35  
36  
37 From the 381,581 nationwide OHCA cases in the All-Japan Utstein Registry of the Japanese  
38  
39 Fire and Disaster Management Agency (FDMA), which holds the Utstein-style information<sup>13</sup>,  
40  
41 recorded between March 11, 2010 and March 10, 2013, we extracted 74,684 family- and  
42  
43 friend/colleague-witnessed OHCA cases with no prehospital physician involvement to  
44  
45 minimize the effect of healthcare providers volunteering for and/or being involved in disaster  
46  
47 medical support (Figure 1). The study period included of the pre-disaster year 2010  
48  
49 (2010.3.11–2011.3.10), the disaster year 2011 (2011.3.11–2012.3.10), and the post-disaster  
50  
51 year 2012 (2012.3.11–2013.3.10). Tsunami-affected prefectures, defined as prefectures in  
52  
53  
54  
55  
56  
57  
58  
59  
60

1  
2  
3  
4 which a tsunami with a maximum height of > 4 meters was observed, included five  
5  
6  
7 prefectures located in the North-East Pacific coast of the Japanese mainland: Aomori, Iwate,  
8  
9  
10 Miyagi, Fukushima and Ibaraki prefectures.<sup>1</sup> The prefectures other than these five tsunami-  
11  
12  
13 affected prefectures were designated as other prefectures.  
14  
15  
16  
17

### 18 *Outcome measures*

19  
20  
21 The primary outcome of this study was provision of BCPR by a family member or a  
22  
23  
24 friend/colleague. The secondary outcomes were a neurologically favorable outcome after 1  
25  
26  
27 month, defined as a cerebral performance category score of 1 (good recovery) or 2 (moderate  
28  
29  
30 disability)<sup>14</sup> and 1-month survival.  
31  
32  
33  
34  
35  
36

### 37 *Data analysis*

38  
39  
40 On the basis of the occurrence of aftershocks, number of evacuees in evacuation centers and  
41  
42  
43 resumption of social activities, we determined that 0-23 weeks from March 11, 2011 was the  
44  
45  
46 period affected by the disaster. We have defined the same period from 2010 to 2012 as the  
47  
48  
49 impact phase.  
50

51  
52 We analysed the 4-week average trends in the BCPR rate after the day of disaster in  
53  
54  
55 the year 2011 and on the same day (11 March) in the pre-disaster year of 2010 and post-  
56  
57  
58 disaster year of 2012 in the tsunami-affected and other prefectures. We investigated whether  
59  
60  
and how the disaster affected the BCPR and outcomes of OHCA in the tsunami-affected

1  
2  
3  
4 prefectures using univariate and multivariable logistic regression analyses. The BCPR rates,  
5  
6  
7 1-month survival rates and neurologically favorable 1-month outcomes were compared  
8  
9  
10 between the disaster year (2011) and the pre-/post-disaster years (2010/2012) during the  
11  
12  
13 impact and the post-impact phases in tsunami-affected and other prefectures.  
14

15  
16 Furthermore, to clarify the association of the impact phase with dispatcher-assisted  
17  
18 and bystander-initiated resuscitation efforts, we calculated the following three indices related  
19  
20 to dispatcher-assisted CPR (DA-CPR) and BCPR in accordance with a previous report<sup>15</sup>: 1)  
21  
22 DA-CPR sensitivity for OHCA, which reflects the number of cases for which DA-CPR was  
23  
24 DA-CPR sensitivity for OHCA, which reflects the number of cases for which DA-CPR was  
25  
26 attempted divided by the number of cases not receiving voluntary-initiated BCPR without  
27  
28 DA-CPR attempt or dispatcher assistance; 2) bystander's compliance to DA-CPR (or the  
29  
30 acceptance rate of DA-CPR), which represents the number of cases receiving dispatcher-  
31  
32 instructed BCPR following a DA-CPR attempt divided by the number of cases for which DA-  
33  
34 CPR was attempted; and 3) the degree of voluntary performance of BCPR (or the rate of  
35  
36 bystander-initiated CPR in OHCA patients without DA-CPR), which is the number of cases  
37  
38 receiving BCPR initiated on a voluntary basis without DA-CPR attempt or dispatcher  
39  
40 assistance divided by the number of cases for which DA-CPR was not attempted.<sup>10,16</sup>  
41  
42  
43  
44  
45  
46  
47  
48  
49  
50

51  
52 Univariate analyses were performed using the chi-square test or Fisher's exact  
53  
54 probability test for nominal variables and the Mann-Whitney *U*-test for continuous variables.  
55  
56  
57 Multivariable logistic regression analysis for BCPR provision included the factors, which  
58  
59 were well known to be associated with BCPR provision: daytime, weekend, patient sex and  
60

1  
2  
3  
4 age, etiology of OHCA (presumed cardiac or not, exogenous origin), family bystander and  
5  
6  
7 DA-CPR instruction. Factors included in multivariable logistic regression analysis for  
8  
9  
10 outcomes were daytime, patient sex and age, presumed cardiac etiology, initial rhythm  
11  
12 (shockable or not), BCPR provision, family bystander, tracheal intubation and epinephrine  
13  
14  
15 administration by paramedics, time interval between witness and emergency call, and time  
16  
17  
18 interval between emergency call and emergency medical service (EMS) arrival at patients  
19  
20  
21 (EMS response time). All tests were two-tailed, and we considered a probability (P) value <  
22  
23  
24 0.05 to be statistically significant. All statistical analyses were performed using the JMP Pro  
25  
26  
27  
28 15 software (SAS Institute, Cary, NC).

## 33 34 **Results**

### 35 36 *Four-week average trends in BCPR provision after the day of disaster*

37  
38  
39 In other prefectures (the tsunami-not-affected prefectures), the trend of BCPR rate was the  
40  
41  
42 same in 2011 (year of disaster) and 2010/2012. The BCPR rate remained at nearly 40%  
43  
44  
45 throughout the 3 years, regardless of the impact phase of the disaster (before and after the  
46  
47  
48 disaster; Figure 2, lower panel). Furthermore, there were no obvious seasonal variations.

49  
50  
51 On the other hand, the trends in the BCPR rate in 2011 (disaster year) differed from  
52  
53  
54 those of 2010/2012 (pre- and post-disaster years) in the tsunami-affected prefectures (Figure  
55  
56  
57 2, upper panel). In 2010/2012, the BCPR rate remained high (> 50%) during weeks 4–23  
58  
59  
60 (corresponding to the spring and summer seasons) whereas it was low (nearly 40%) during

1  
2  
3  
4 weeks 36–43 (winter season). However, the BCPR rate remained low except for weeks 8–15  
5  
6  
7 after the disaster, and no seasonal variations were observed in 2011. The impact phase  
8  
9  
10 coincided with the period during which the differences in the 4-week averages of BCPR  
11  
12  
13 between 2011 and 2010/2012 were recognized in the tsunami-affected prefectures.  
14  
15  
16  
17

18  
19 *Differences in the backgrounds and characteristics of OHCA between the disaster year and*  
20  
21 *the pre-/post-disaster years*  
22  
23

24  
25 In the tsunami-affected prefectures, during the impact phase, the incidence of OHCA during  
26  
27 weekends and the proportion of cases of presumed cardiac etiology in 2011 were higher than  
28  
29 those in 2010/2012, whereas the rate of DA-CPR was lower. As expected, transportation time  
30  
31 from the scene to the hospital was prolonged in 2011. During the post-impact phase, there  
32  
33 was no significant difference in backgrounds between 2011 and 2010/2012 (Table 1).  
34  
35  
36  
37  
38

39  
40 In other prefectures, significant differences in some prehospital confounders were  
41  
42 observed between 2011 and 2010/2012 during the impact and post-impact phases. However,  
43  
44 the differences in these parameters were very small (Supplemental Table 1).  
45  
46  
47  
48  
49  
50

51  
52 *Multivariable regression analyses of the differences in BCPR provision and outcomes*  
53  
54 *between the disaster year and the pre-/post-disaster years*  
55  
56

57  
58 In the tsunami-affected prefectures, the rates of BCPR, 1-month survival and 1-month  
59  
60 neurologically favorable outcome in 2011 were significantly lower than those in 2010/2012

1  
2  
3  
4 during the impact phase. During the post-impact phase, no significant difference in any of  
5  
6  
7 these parameters was observed between 2011 and 2010/2012. (Table 2). In other prefectures,  
8  
9  
10 significant differences were observed neither during the impact phase nor during the post-  
11  
12  
13 impact phase (Supplemental Table 2).  
14

15  
16 The multivariable regression analysis disclosed that that DA-CPR (with adjusted  
17  
18 ORs ranging from 7.07 to 9.27) was a common and major factor associated with BCPR  
19  
20  
21 provision, regardless of the phase and prefecture. The major factors associated with a  
22  
23  
24 neurologically favorable outcome included shockable initial rhythm and EMS response time.  
25  
26  
27 Notably, the adjusted OR (95% confidence interval [CI]) of shockable initial rhythms for  
28  
29  
30 neurologically favorable outcome was much higher during the impact phase than during the  
31  
32  
33 post-impact phase in tsunami-affected prefectures (12.7 [7.3–20.9] vs. 7.1 [4.72–10.8]).  
34  
35  
36  
37  
38  
39

#### 40 *Analysis of indices for dispatcher-assisted and bystander-initiated resuscitation efforts*

41  
42 In tsunami-affected prefectures, DA-CPR sensitivity and bystander's compliance to DA-CPR  
43  
44  
45 appeared to be suppressed during the impact phase in 2011, being 55.8% and 62.1%,  
46  
47  
48 respectively in 2011, and 60.0% and 69.5%, respectively in 2010/2012. However, the  
49  
50  
51 difference between 2011 and 2010/2012 was significant only for bystander's compliance to  
52  
53  
54 DA-CPR (Adjusted OR; 95% CI, 0.72; 0.57–0.92). During the post-impact phase, there were  
55  
56  
57 no significant differences in these indices between 2011 and 2010/2012. Difference in the  
58  
59  
60 performance of BCPR was detected neither during the impact phase nor during the post-

1  
2  
3  
4 impact phase (Table 3).  
5

6  
7 In other prefectures, none of the three indices differed between 2011 and 2010/2012;  
8  
9  
10 neither during the impact phase nor during the post-impact phase (Supplemental Table 3).  
11  
12  
13  
14

## 15 **Discussion**

16  
17  
18 In disaster mental health, the reactions of the community and the individual are usually  
19  
20  
21 divided to four phases (heroic phase, honeymoon phase, disillusionment phase and  
22  
23  
24 restoration phase)<sup>17</sup> although the duration of these phase may vary depending on the scale and  
25  
26  
27 type of disaster. The impact phase in this study covers the period from heroic phase to  
28  
29  
30 disillusionment phase. This relatively long impact phase and the wide area affected by the  
31  
32  
33 disaster may contribute to the detection of a significant impact of disaster in this study.  
34  
35

36  
37 Loss of family members and friends, lack of employment stability, or extensive  
38  
39  
40 damage to property, resulting in loss of or a decrease in income are reported as risk factors  
41  
42  
43 for the development of disaster-related mental health problems.<sup>18-20</sup> In this study, the BCPR  
44  
45  
46 rate in tsunami-affected prefectures temporally increased during the 8–11 weeks after the  
47  
48  
49 disaster but remained low thereafter, reflecting a temporal relief in anxiety due to increased  
50  
51  
52 provision of supplies and accommodation during the “honeymoon phase” and recognition of  
53  
54  
55 depressed economic resilience, repeated aftershocks and escape or avoidance behavior<sup>21</sup>  
56  
57  
58 during disillusionment phase.  
59  
60

The BCPR rate varies between countries, but the BCPR rate in Japan in the 3 years



1  
2  
3  
4 from 2010 to 2012 was as high as or higher than that in the European Union and United  
5  
6 States. The higher BCPR rate in tsunami-affected prefectures, compared with other  
7  
8 prefectures might be due to the higher proportion of citizens having attended the BLS training  
9  
10 courses (17.0% in tsunami-affected prefectures and 11.6% in other prefectures in 2008).<sup>22,23</sup>  
11  
12 Compared with the patients with OHCA in the other (non-affected) prefectures, those in the  
13  
14 tsunami-affected prefectures were subject to relatively higher BCPR rates in the pre- and  
15  
16 post-disaster years, particularly during the spring and summer seasons, which is identical to  
17  
18 that in the impact phase that we determined. Major industries in the affected areas included  
19  
20 fishery, agriculture and food processing managed by corporative unions. The population,  
21  
22 particularly the elderly, typically endures a rugged winter at home, and their social activities  
23  
24 diminish at the end of autumn and over the winter. Meanwhile, during the spring and  
25  
26 summer, citizens including the elderly cooperate in agricultural work and preparation of  
27  
28 social events, including festivals and outdoor events.<sup>24</sup> Increased collaborative activities of  
29  
30 citizens, including the elderly, in these seasons and accommodativeness as a general  
31  
32 personality trait of the citizens might be one of the reasons for this seasonal variation in  
33  
34 BCPR rate because OHCA cases in these seasons are frequently managed by many  
35  
36 bystanders including those with training experience.  
37  
38  
39  
40  
41  
42  
43  
44  
45  
46  
47  
48  
49  
50  
51  
52  
53

54 Surveys on citizens and EMS personnel who survived the disaster in tsunami-affected  
55  
56 prefectures reported that more than half of them lost their family and friends/colleagues.<sup>25</sup>  
57  
58 People who died during the disaster were mostly the elderly (54.40%), suggesting that the  
59  
60

1  
2  
3  
4 proportion of trained bystanders was not affected by the disaster<sup>26</sup>. Thus, decreased rates of  
5  
6 BCPR and DA-CPR may be attributed to the decreased collaborative social activities and  
7  
8  
9 psychological reactions of dispatchers and bystanders, which may interfere with  
10  
11  
12 communication between bystanders and dispatchers.  
13  
14

15  
16 The 2011 earthquake and the earthquake-associated tsunami were followed by a  
17  
18 nuclear accident in the Fukushima prefecture. People who had a false understanding of  
19  
20 radiation were afraid to interact with evacuees and avoided contact. For these reasons, it is  
21  
22 highly possible that nuclear pollution may interfere with bystander-initiated CPR provision  
23  
24 due to augmented fear of nuclear pollution during CPR, particularly of refugees from the  
25  
26 polluted area.<sup>27</sup> Recent studies on the COVID-19 pandemic on BCPR support this  
27  
28 assumption.<sup>12</sup>  
29  
30  
31  
32  
33  
34

35  
36 It might be difficult to prevent the BCPR and certain outcomes from deteriorating  
37  
38 during the impact phase. The analysis of the three indices related to DA-CPR and BCPR  
39  
40 showed that the level of voluntary performance of BCPR was relatively preserved during the  
41  
42 impact phase in tsunami-affected prefectures. Multivariable regression analysis showed that  
43  
44 shockable initial rhythm was a major factor associated with neurologically favorable  
45  
46 outcomes. This suggests that BLS training including automated external defibrillator (AED)  
47  
48 use and its supply might function as preparedness for disaster and major accidents.  
49  
50  
51  
52  
53  
54  
55  
56  
57  
58  
59  
60

## Limitation

1  
2  
3  
4 The present study has several strengths. Firstly, this study focused on alterations in  
5  
6 bystander-initiated and dispatcher-instructed BCPR after a large-scale disaster. Secondly, not  
7  
8 only before-after comparisons but also differences in trends were analysed between tsunami-  
9  
10 affected and -unaffected prefectures using a large nationwide dataset. However, this study  
11  
12 also has several limitations. First, although the catastrophe occurred in the coastal areas of  
13  
14 some of the prefectures, the analyses were performed after dividing the prefectures. In  
15  
16 tsunami-affected prefectures, no major urban areas were located in the coastal area, and  
17  
18 differences in BCPR intervention between urban and rural areas<sup>28</sup> were excluded in this  
19  
20 study. Second, bystander-specific data, such as age, sex and training experience were not  
21  
22 included in the database and therefore not available for study. Third, no researches were  
23  
24 conducted on whether the bystanders were actually psychologically affected. Therefore, these  
25  
26 factors potentially associated with BCPR quality might affect the quality of the study  
27  
28 results.<sup>29</sup> Fourth, no comparative analysis was performed with the results of other disasters.  
29  
30 Fifth, as with other observational studies, the validity of data is another potential limitation.  
31  
32  
33  
34  
35  
36  
37  
38  
39  
40  
41  
42  
43  
44  
45  
46  
47  
48

## 49 **Conclusions**

50  
51 A large-scale disaster may influence bystander-initiated CPR and outcomes of OHCA  
52  
53 witnessed by family/friends/colleagues. BLS training might serve as preparedness for disaster  
54  
55 and major accidents.  
56  
57  
58  
59  
60

## Acknowledgments

We thank the EMS personnel and FDMA in Japan for their cooperation in collecting and managing the All-Japan Utstein Registry data. TU and KT equally contributed to this article as first authors.

For peer review only

1  
2  
3  
4 **Article information**  
5

6 **Corresponding Author:** Tomoyuki Ushimoto, MD, PhD, Department of Emergency  
7  
8

9 Medicine, Kanazawa Medical University, 1-1 Daigaku, Uchinada-machi, Kahoku-gun,  
10  
11

12 Ishikawa 920-0293, Japan  
13  
14  
15  
16  
17

18 **Contributions:** The corresponding author attests that all listed authors meet authorship  
19  
20  
21 criteria and that no others meeting the criteria have been omitted.  
22  
23

24 TU and KT had full access to all the data in the study and take responsibility for the integrity  
25  
26  
27 of the data and the accuracy of the data analysis. TU and KT equally contributed to this  
28  
29  
30 article as first authors.  
31  
32

33 Study concept and design: TU and HI.  
34

35 Acquisition, analysis, and interpretation of data: All authors.  
36  
37

38 Drafting of the manuscript: AY, HI, KT and TU.  
39  
40

41 Clinical revision of the manuscript for important intellectual content: TU, HI, KT and YW.  
42  
43

44 Statistical analysis: TU, KT, and HI.  
45  
46

47 Obtained funding: None.  
48  
49

50 Administrative, technical, or material support: HI and YW.  
51  
52

53 Study supervision: HI and YW.  
54  
55  
56  
57  
58  
59  
60

**Copyright:** The corresponding author has the right to grant on behalf of all authors and does

1  
2  
3  
4 grant on behalf of all authors, a worldwide licence to the Publishers and its licensees in  
5  
6  
7 perpetuity, in all forms, formats and media (whether known now or created in the future), to  
8  
9  
10 i) publish, reproduce, distribute, display, and store the Contribution, ii) translate the  
11  
12 Contribution into other languages, create adaptations, reprints, include within collections and  
13  
14  
15 create summaries, extracts and/or, abstracts of the Contribution, iii) create any other  
16  
17  
18 derivative work(s) based on the Contribution, iv) to exploit all subsidiary rights in the  
19  
20  
21 Contribution, v) the inclusion of electronic links from the Contribution to third party material  
22  
23  
24 wherever it may be located; and, vi) licence any third party to do any or all of the above.  
25  
26  
27  
28  
29

30 **Conflict of Interest Disclosures:** All authors have completed the ICMJE uniform disclosure  
31  
32 form at [www.icmje.org/coi\\_disclosure.pdf](http://www.icmje.org/coi_disclosure.pdf) and declare: no support from any organization for  
33  
34 the submitted work; no financial relationships with any organizations that might have an  
35  
36  
37 interest in the submitted work in the previous three years; no other relationships or activities  
38  
39  
40 that could appear to have influenced the submitted work.  
41  
42  
43  
44  
45  
46  
47  
48

49 **Ethical approval:** This study was approved by the institutional review board of the Ishikawa  
50  
51 Medical Control Council and conducted by the study group comprising of members of the  
52  
53  
54 Ishikawa Medical Control Council and their collaborators. Patient consent was not required  
55  
56  
57 for use of the secondary data.  
58  
59  
60

1  
2  
3  
4 **Transparency:** TU affirmed that the manuscript is an honest, accurate, and transparent  
5  
6  
7 account of the study.  
8  
9

10  
11  
12  
13 **Funding:** None.  
14  
15  
16  
17

18  
19 **Data sharing:** No additional data available.  
20  
21  
22

23  
24 **Patient and Public involvement:** Patients or the public were not involved in the design, or  
25  
26  
27 conduct, or reporting, or dissemination plans of our study.  
28  
29

30  
31  
32  
33 **Additional information:** Some references used in this article are available online and cited  
34  
35  
36 as embedded hyperlinks.  
37  
38  
39  
40  
41  
42  
43  
44  
45  
46  
47  
48  
49  
50  
51  
52  
53  
54  
55  
56  
57  
58  
59  
60

## References

1. Department of International Affairs, Japan Science and Technology Agency. The Great East Japan Earthquake Information from Official Websites, 2011 (Accessed 23 March 2021, at [https://www.jst.go.jp/pr/pdf/great\\_east\\_japan\\_earthquake.pdf](https://www.jst.go.jp/pr/pdf/great_east_japan_earthquake.pdf)).
2. Fire and Disaster Management Agency (Japan). Great East Japan Earthquake (in Japanese) (Accessed 23 March 2021, at <https://www.fdma.go.jp/disaster/higashinihon/>).
3. Ozdemir O, Boysan M, Guzel Ozdemir P, Yilmaz E. Relationships between posttraumatic stress disorder (PTSD), dissociation, quality of life, hopelessness, and suicidal ideation among earthquake survivors. *Psychiatry Res* 2015; 228: 598-605. doi: 10.1016/j.psychres.2015.05.045.
4. Makwana N. Disaster and its impact on mental health: A narrative review. *J Family Med Prim Care* 2019; 8: 3090-3095. doi: 10.4103/jfmpe.jfmpe\_893\_19.
5. Leor J, Poole WK, Kloner RA. Sudden cardiac death triggered by an earthquake. *N Engl J Med* 1996; 34: 413-419.
6. Ogawa K, Tsuji I, Shiono K, Hisamichi S. Increased acute myocardial infarction mortality following the 1995 Great Hanshin-Awaji earthquake in Japan. *Int J Epidemiol* 2002; 29: 449-455.
7. Sokejima S, Nakatani Y, Kario K, Kayaba K, Minowa M, Kagamimori S. Seismic intensity and risk of cerebrovascular stroke: 1995 Hanshin-Awaji earthquake. *Prehosp Disaster Med* 2004; 19: 297-306.
8. Yamashita A, Maeda T, Myojo Y, Wato Y, Ohta K, Inaba H. Temporal variations in dispatcher-assisted and bystander-initiated resuscitation efforts. *Am J Emerg Med* 2018; 36: 2203-2210. doi: 10.1016/j.ajem.2018.03.080.
9. Savastano S, Vanni V. Cardiopulmonary resuscitation in real life: The most frequent fears of lay rescuers. *Resuscitation* 2011; 82: 568-571. doi:10.1016/j.resuscitation.2010.10.010
10. Pranata R, Lim MA, Yonas E, Siswanto BB, Meyer M. Out-of-hospital cardiac arrest



1  
2  
3 prognosis during the COVID-19 pandemic. Intern Emerg Med 2020; (0123456789): 7-9.  
4  
5 doi:10.1007/s11739-020-02428-7.  
6

7  
8 11. Japan Meteorological Agency. The 2011 Great East Japan Earthquake: Number of  
9  
10 aftershock (in Japanese) (Accessed 23 March 2021, at  
11  
12 [http://www.data.jma.go.jp/svd/eqev/data/2011\\_03\\_11\\_tohoku/aftershock/](http://www.data.jma.go.jp/svd/eqev/data/2011_03_11_tohoku/aftershock/)).  
13

14  
15 12. Japan National Council of Social Welfare. Number of disaster volunteers (in Japanese),  
16  
17 (Accessed 23 March 2021, at  
18  
19 [https://www.saigaivc.com/new/?tag=2011%E6%9D%B1%E6%97%A5%E6%9C%AC%E5](https://www.saigaivc.com/new/?tag=2011%E6%9D%B1%E6%97%A5%E6%9C%AC%E5%A4%A7%E9%9C%87%E7%81%BD)  
20  
21 [%A4%A7%E9%9C%87%E7%81%BD](https://www.saigaivc.com/new/?tag=2011%E6%9D%B1%E6%97%A5%E6%9C%AC%E5%A4%A7%E9%9C%87%E7%81%BD) ).  
22

23  
24 13. Reconstruction Agency (Japan). Recovery and Reconstruction from the Great East Japan  
25  
26 Earthquake, 2012 (in Japanese) (Accessed 23 March 2021, at  
27  
28 [https://www.reconstruction.go.jp/topics/20130104\\_higashinippondaishinsai\\_fukkoh.pdf](https://www.reconstruction.go.jp/topics/20130104_higashinippondaishinsai_fukkoh.pdf)).  
29

30  
31 14. Jacobs I, Nadkarni V, Bahr J, et al. Cardiac arrest and cardiopulmonary resuscitation  
32  
33 outcome reports: update and simplification of the Utstein templates for resuscitation  
34  
35 registries: a statement for healthcare professionals from a task force of the International  
36  
37 liaison Committee on resuscitation. Circulation 2004; 110: 3385–97.  
38

39  
40 15. Portal Site of Official Statistics of Japan (e-Stat). 2010 Population Census  
41  
42 (Accessed 23 March 2021, at [https://www.e-stat.go.jp/en/stat-](https://www.e-stat.go.jp/en/stat-search/files?page=1&toukei=00200521&tstat=000001039448)  
43  
44 [search/files?page=1&toukei=00200521&tstat=000001039448](https://www.e-stat.go.jp/en/stat-search/files?page=1&toukei=00200521&tstat=000001039448)).  
45

46  
47 16. Portal Site of Official Statistics of Japan website. 2010 Population Census (Accessed 23  
48  
49 March 2021, at <http://www.stat.go.jp/english/data/kokusei/2010/summary.html>).  
50

51  
52 17. Math SB, Nirmala MC, Moirangthem S, Kumar NC. Disaster Management: Mental  
53  
54 Health Perspective. Indian J Psychol Med 2015; 37: 261-71. doi: 10.4103/0253-7176.162915.  
55

56  
57 18. Norris FH, Friedman MJ, Watson PJ, Byrne CM, Diaz E, Kaniasty K. 60,000 disaster  
58  
59 victims speak: Part I. An empirical review of the empirical literature, 1981-2001. Psychiatry  
60  
2002; 65: 207-39.

- 1  
2  
3  
4  
5  
6  
7  
8  
9  
10  
11  
12  
13  
14  
15  
16  
17  
18  
19  
20  
21  
22  
23  
24  
25  
26  
27  
28  
29  
30  
31  
32  
33  
34  
35  
36  
37  
38  
39  
40  
41  
42  
43  
44  
45  
46  
47  
48  
49  
50  
51  
52  
53  
54  
55  
56  
57  
58  
59  
60
19. Başoğlu M, Kiliç C, Salcioğlu E, Livanou M. Prevalence of posttraumatic stress disorder and comorbid depression in earthquake survivors in Turkey: an epidemiological study. *J Trauma Stress* 2004; 17: 133-41.
20. van Griensven F, Chakkraband ML, Thienkrua W, et al. Mental health problems among adults in tsunami-affected areas in southern Thailand. *JAMA* 2006; 296: 537-48.
21. Avoidance behavior. (n.d.) Miller-Keane Encyclopedia and Dictionary of Medicine, Nursing, and Allied Health, Seventh Edition. (2003). (Retrieved 23 March 2021 from <https://medical-dictionary.thefreedictionary.com/Avoidance+behavior>).
22. Nishi T, Kamikura T, Funada A, Myojo Y, Ishida T, Inaba H. Are regional variations in activity of dispatcher-assisted cardiopulmonary resuscitation associated with out of-hospital cardiac arrests outcomes? A nation-wide population-based cohort study. *Resuscitation* 2016; 98: 27–34. doi: 10.1016/j.resuscitation.2015.10.004.
23. Fire and Disaster Management Agency (Japan). Rescue operations and first-aid, 2009 (in Japanese) (Accessed 23 March 2021, at [https://www.fdma.go.jp/publication/rescue/items/03\\_genkyou.pdf](https://www.fdma.go.jp/publication/rescue/items/03_genkyou.pdf)).
24. Maeda T, Yamashita A, Myojo Y, Wato Y, Inaba H. Augmented survival of out-of-hospital cardiac arrest victims with the use of mobile phones for emergency communication under the DA-CPR protocol getting information from callers beside the victim. *Resuscitation* 2016; 107: 80-87. doi:10.1016/j.resuscitation.2016.08.010
25. Portal Site of Official Statistics of Japan website. Population Estimates, Annual Report 2008 (Accessed 23 March 2021, at [https://www.e-stat.go.jp/en/stat-search/files?page=1&layout=datalist&toukei=00200524&tstat=000000090001&cycle=7&year=20080&month=0&tclass1=000001011679&result\\_back=1](https://www.e-stat.go.jp/en/stat-search/files?page=1&layout=datalist&toukei=00200524&tstat=000000090001&cycle=7&year=20080&month=0&tclass1=000001011679&result_back=1)).
26. Ministry of Health, Labor and Welfare (Japan). Overview of 2011 vital statistics, death situation due to the Great East Japan Earthquake from the viewpoint of vital statistics. (Accessed 23 March 2021, at

1  
2  
3 [https://www.mhlw.go.jp/toukei/saikin/hw/jinkou/kakutei11/dl/14\\_x34.pdf](https://www.mhlw.go.jp/toukei/saikin/hw/jinkou/kakutei11/dl/14_x34.pdf).  
4

5 27. Maeda M, Oe M. Mental Health Consequences and Social Issues After the Fukushima  
6 Disaster. *Asia Pac J Public Health* 2017; 29: 36-46. doi:10.1177/1010539516689695.  
7

8 28. Mathiesen W, Bjørshol C, Kvaløy J, Søreide E. Effects of modifiable prehospital factors  
9 on survival after out-of-hospital cardiac arrest in rural versus urban areas. *Crit Care* 2018; 22:  
10 99. doi:10.1186/s13054-018-2017-x.  
11

12 29. Takei Y, Nishi T, Matsubara H, Hashimoto M, Inaba H. Factors associated with quality  
13 of bystander CPR: the presence of multiple rescuers and bystander-initiated CPR without  
14 instruction. *Resuscitation* 2014; 85: 492-8. doi:10.1016/j.resuscitation.2013.12.019.  
15  
16  
17  
18  
19  
20  
21  
22  
23  
24  
25  
26  
27  
28  
29  
30  
31  
32  
33  
34  
35  
36  
37  
38  
39  
40  
41  
42  
43  
44  
45  
46  
47  
48  
49  
50  
51  
52  
53  
54  
55  
56  
57  
58  
59  
60

1  
2  
3  
4 **Legends to figures**  
5

6 **Figure 1:** Data selection and subgroup extraction  
7  
8

9 OHCA, out-of-hospital cardiac arrest; EMS, emergency medical service.  
10  
11  
12  
13  
14

15 **Figure 2:** Four-week average trends of bystander cardiopulmonary resuscitation in tsunami-  
16  
17  
18 affected prefectures and other prefectures  
19  
20

21 BCPR, bystander cardiopulmonary resuscitation; impact phase, 0-23 weeks from March 11.  
22  
23  
24  
25  
26

27 **Supplemental Figure:** Analysis of the disaster status and social responses  
28  
29

30 Mw, Moment magnitude.  
31  
32  
33  
34  
35  
36  
37  
38  
39  
40  
41  
42  
43  
44  
45  
46  
47  
48  
49  
50  
51  
52  
53  
54  
55  
56  
57  
58  
59  
60

**Table 1** Background, characteristics, and time factors of family- and friend/colleague-witnessed out-of-hospital cardiac arrest cases in tsunami-affected prefectures

| Background, characteristics, and time factors     | Impact phase      |                          | Unadjusted OR<br>(95% CI) <sup>a)</sup> or<br>P-value | Post-impact phase   |                          | Unadjusted OR<br>(95% CI) <sup>a)</sup> or<br>P-value |
|---------------------------------------------------|-------------------|--------------------------|-------------------------------------------------------|---------------------|--------------------------|-------------------------------------------------------|
|                                                   | 2011<br>(N = 882) | 2010/2012<br>(N = 1,565) |                                                       | 2011<br>(N = 1,179) | 2010/2012<br>(N = 2,454) |                                                       |
| Family-witnessed patients, No. (%)                | 783 (88.8)        | 1,404 (89.7)             | 0.91 (0.70–1.18)                                      | 1,074 (91.1)        | 2,219 (90.4)             | 1.08 (0.85–1.38)                                      |
| Daytime (7:00 a.m.–7:00 p.m.), No. (%)            | 520 (59.0)        | 950 (60.7)               | 0.93 (0.79–1.10)                                      | 682 (57.9)          | 1,485 (60.5)             | 0.90 (0.79–1.03)                                      |
| Weekend, No. (%)                                  | 141 (16.0)        | 192 (12.3)               | <b>1.36 (1.08–1.72)</b>                               | 146 (12.4)          | 338 (13.8)               | 0.89 (0.72–1.09)                                      |
| Age, median (IQR), y                              | 78 (65–84)        | 76 (63–84)               | 0.12                                                  | 77 (66–84)          | 78 (67–85)               | 0.17                                                  |
| Male patient, No. (%)                             | 598 (67.8)        | 1,002 (64.0)             | 1.18 (1.00–1.41)                                      | 734 (62.3)          | 1,525 (62.1)             | 1.01 (0.87–1.16)                                      |
| Presumed cardiac etiology, No. (%)                | 554 (62.8)        | 877 (56.0)               | <b>1.33 (1.12–1.57)</b>                               | 725 (61.5)          | 1,443 (58.8)             | 1.12 (0.97–1.29)                                      |
| Exogenous origin <sup>b)</sup> , No. (%)          | 102 (11.6)        | 206 (13.2)               | 0.86 (0.67–1.11)                                      | 118 (10.0)          | 259 (10.6)               | 0.94 (0.75–1.19)                                      |
| Shockable initial rhythm, No. (%)                 | 162 (18.4)        | 271 (17.3)               | 1.07 (0.87–1.33)                                      | 185 (15.7)          | 345 (14.1)               | 1.14 (0.94–1.38)                                      |
| Dispatcher-assisted CPR, No. (%)                  | 433 (49.1)        | 835 (53.4)               | <b>0.84 (0.72–0.99)</b>                               | 598 (50.7)          | 1,240 (50.5)             | 1.01 (0.88–1.16)                                      |
| Defibrillation by bystanders with an AED, No. (%) | 4 (0.5)           | 9 (0.6)                  | 0.79 (0.24–2.58)                                      | 11 (0.9)            | 12 (0.6)                 | 1.65 (0.73–3.75)                                      |
| Epinephrine administration by paramedics, No. (%) | 153 (17.4)        | 256 (16.4)               | 1.07 (0.86–1.34)                                      | 231 (19.6)          | 448 (19.7)               | 1.00 (0.84–1.19)                                      |
| Tracheal intubation by paramedics, No. (%)        | 78 (8.8)          | 161 (10.3)               | 0.85 (0.64–1.12)                                      | 103 (8.7)           | 251 (10.2)               | 0.84 (0.66–1.07)                                      |
| Time intervals, median (IQR), min                 |                   |                          |                                                       |                     |                          |                                                       |
| Witness-to-emergency call                         | 2 (0–5)           | 2 (0–5)                  | 0.71                                                  | 2 (0–5)             | 2 (0–5)                  | 0.49                                                  |
| EMS response time <sup>c)</sup>                   | 8 (7–11)          | 9 (7–11)                 | 0.45                                                  | 9 (7–11)            | 9 (7–12)                 | 0.11                                                  |

|                                                   |            |            |               |            |            |      |
|---------------------------------------------------|------------|------------|---------------|------------|------------|------|
| EMS arrival at patient-to-arrival at the hospital | 21 (16–28) | 20 (15–27) | < <b>0.05</b> | 22 (16–29) | 22 (16–29) | 0.74 |
|---------------------------------------------------|------------|------------|---------------|------------|------------|------|

---

OR, odds ratio; CI, confidence interval; IQR, interquartile range; CPR, cardiopulmonary resuscitation; AED, automated external defibrillator;

EMS, emergency medical service; impact phase, 0-23 weeks from March 11;

post-impact phase, from 24 weeks after March 11 until March 11 of the following year

a) 2010/2012 as a reference

b) Asphyxia, submersion, hypothermia, poisoning, and trauma

c) Time interval between emergency call and EMS arrival at patient

**Table 2** Phasic comparisons of bystander cardiopulmonary resuscitation and outcomes between 2011 and 2010/2012 in tsunami-affected prefectures

| BCPR and outcomes                         | Impact phase      |                          | Adjusted OR<br>(95% CI) with<br>2010/2012 as a<br>reference | Post-impact phase   |                          | Adjusted OR<br>(95% CI) with<br>2010/2012 as a<br>reference |
|-------------------------------------------|-------------------|--------------------------|-------------------------------------------------------------|---------------------|--------------------------|-------------------------------------------------------------|
|                                           | 2011<br>(N = 882) | 2010/2012<br>(N = 1,565) |                                                             | 2011<br>(N = 1,179) | 2010/2012<br>(N = 2,454) |                                                             |
| BCPR rate, No. (%)                        | 375 (42.5)        | 754 (48.2)               | <b>0.82 (0.68–0.99)</b>                                     | 510 (43.3)          | 1,068 (43.5)             | 0.99 (0.84–1.16)                                            |
| 1-month survival, No. (%)                 | 75 (8.5)          | 168 (10.7)               | <b>0.72 (0.52–0.99)</b>                                     | 103 (8.7)           | 200 (8.2)                | 1.02 (0.78–1.33)                                            |
| Neurologically favorable outcome, No. (%) | 35 (4.0)          | 82 (5.2)                 | <b>0.62 (0.38–0.98)</b>                                     | 48 (4.1)            | 107 (4.4)                | 0.89 (0.61–1.29)                                            |

BCPR, bystander cardiopulmonary resuscitation; impact phase, 0-23 weeks from March 11;  
 post-impact phase, from 24 weeks after March 11 until March 11 of the following year; OR, odds ratio; CI, confidence interval.

**Table 3** Phasic comparisons of indices for dispatcher-assisted and bystander-initiated resuscitation efforts between 2011 and 2010/2012 in tsunami-affected prefectures

| Indices related to DA-CPR and BCPR              | Impact phase          |                       | Unadjusted OR (95% CI) with 2010/2012 as a reference | Post-impact phase |                    | Unadjusted OR (95% CI) with 2010/2012 as a reference |
|-------------------------------------------------|-----------------------|-----------------------|------------------------------------------------------|-------------------|--------------------|------------------------------------------------------|
|                                                 | 2011                  | 2010/2012             |                                                      | 2011              | 2010/2012          |                                                      |
| DA-CPR sensitivity, No./total (%)               | 433/776 (55.8)        | 835/1,391 (60.0)      | 0.84 (0.70–1.00)                                     | 598/1,062 (56.3)  | 1,240/2,224 (55.8) | 1.02 (0.88–1.19)                                     |
| Bystander's compliance to DA-CPR, No./total (%) | <b>269/433 (62.1)</b> | <b>255/835 (69.5)</b> | <b>0.72 (0.57–0.92)</b>                              | 393/598 (65.7)    | 838/1,240 (67.6)   | 0.92 (0.75–1.13)                                     |
| Voluntary performance of BCPR, No./total (%)    | 106/449 (23.6)        | 174/730 (23.8)        | 0.99 (0.72–1.07)                                     | 117/581 (20.1)    | 230/1,214 (19.0)   | 1.08 (0.84–1.39)                                     |

DA-CPR, dispatcher-assisted cardiopulmonary resuscitation; BCPR, bystander cardiopulmonary resuscitation; impact phase, 0-23 weeks from March 11; post-impact phase, from 24 weeks after March 11 until March 11 of the following year; OR, odds ratio; CI, confidence interval.



**Supplemental Table 1** Background, characteristics, and time factors of family- and friend/colleague-witnessed out-of-hospital cardiac arrest cases in non-affected prefectures

| Background, characteristics, and time factors     | Impact phase     |                        | Unadjusted OR (95% CI) <sup>a</sup> or P-value | Post-impact phase |                        | Unadjusted OR (95% CI) <sup>a</sup> or P-value |
|---------------------------------------------------|------------------|------------------------|------------------------------------------------|-------------------|------------------------|------------------------------------------------|
|                                                   | 2011 (N = 9,696) | 2010/2012 (N = 17,985) |                                                | 2011 (N = 14,024) | 2010/2012 (N = 26,899) |                                                |
| Family-witnessed patients, No. (%)                | 8,771 (90.5)     | 16,211 (90.1)          | 1.04 (0.95–1.13)                               | 12,679 (90.4)     | 24,452 (90.9)          | 0.94 (0.88–1.01)                               |
| Daytime (7:00 a.m.–7:00 p.m.), No. (%)            | 5,741 (59.2)     | 10,653 (59.2)          | 1.00 (0.95–1.05)                               | 8,285 (59.1)      | 16,124 (59.9)          | 0.97 (0.93–1.01)                               |
| Weekend, No. (%)                                  | 1,362 (14.1)     | 2,424 (13.5)           | 1.05 (0.98–1.13)                               | 1,971 (14.1)      | 3,659 (13.6)           | 1.04 (0.98–1.10)                               |
| Age, median (IQR), y                              | 77 (66–85)       | 77 (66–85)             | 0.57                                           | 77 (66–85)        | 78 (67–85)             | 0.05                                           |
| Male patient, No. (%)                             | 6,113 (63.1)     | 11,429 (63.6)          | 0.98 (0.93–1.03)                               | 8,846 (63.1)      | 16,795 (62.4)          | 1.03 (0.99–1.07)                               |
| Presumed cardiac etiology, No. (%)                | 5,661 (58.4)     | 10,483 (58.3)          | 1.00 (0.96–1.06)                               | 8,220 (58.6)      | 16,085 (59.8)          | <b>0.95 (0.91–0.99)</b>                        |
| Exogenous origin <sup>b</sup> , No. (%)           | 1,232 (12.7)     | 2,202 (12.2)           | 1.04 (0.97–1.12)                               | 1,709 (12.2)      | 2,845 (10.6)           | <b>1.17 (1.10–1.25)</b>                        |
| Shockable initial rhythm, No. (%)                 | 1,399 (14.4)     | 2,598 (14.5)           | 1.00 (0.93–1.07)                               | 1,979 (14.1)      | 3,676 (13.7)           | 1.04 (0.98–1.10)                               |
| Dispatcher-assisted CPR, No. (%)                  | 4,882 (50.4)     | 8,833 (49.1)           | 1.05 (1.00–1.10)                               | 7,139 (50.9)      | 13,640 (50.7)          | 1.01 (0.97–1.05)                               |
| Defibrillation by bystanders with an AED, No. (%) | 67 (0.7)         | 145 (0.8)              | 0.60 (0.64–1.15)                               | 101 (0.7)         | 197 (0.8)              | 0.91 (0.72–1.16)                               |
| Epinephrine administration by paramedics, No. (%) | 2,097 (21.6)     | 3,891 (21.6)           | 1.00 (0.94–1.06)                               | 3,084 (22.0)      | 6,106 (23.5)           | <b>0.92 (0.88–0.97)</b>                        |
| Tracheal intubation by paramedics, No. (%)        | 845 (8.7)        | 1,697 (9.4)            | <b>0.92 (0.84–0.99)</b>                        | 1,246 (8.9)       | 2,500 (9.3)            | 0.95 (0.89–1.02)                               |
| Time intervals, median (IQR), min                 |                  |                        |                                                |                   |                        |                                                |
| Witness-to-emergency call                         | 2 (0–5)          | 2 (0–5)                | <b>&lt;0.005</b>                               | 2 (0–5)           | 2 (0–5)                | 0.24                                           |

|                                                   |            |            |      |            |            |                 |
|---------------------------------------------------|------------|------------|------|------------|------------|-----------------|
| EMS response time <sup>c)</sup>                   | 8 (7–11)   | 8 (7–10)   | 0.10 | 8 (7–11)   | 8 (7–11)   | 0.86            |
| Arrival at the patient-to-arrival at the hospital | 23 (18–30) | 23 (18–30) | 0.08 | 23 (18–30) | 24 (18–31) | <b>&lt;0.01</b> |

IQR, interquartile range; CPR, cardiopulmonary resuscitation; AED, automated external defibrillator; EMS, emergency medical service; impact phase, 0-23 weeks from March 11; post-impact phase, from 24 weeks after March 11 until March 11 of the following year; OR, odds ratio; CI, confidence interval.

a) 2010/2012 as a reference

b) Asphyxia, submersion, hypothermia, poisoning, and trauma

c) Time interval between emergency call and EMS arrival at patient

**Supplemental Table 2** Phasic comparisons of bystander cardiopulmonary resuscitation and outcomes between 2011 and 2010/2012 in non-affected prefectures

| BCPR and outcomes                         | Impact phase        |                           | Adjusted OR<br>(95% CI) with<br>2010/2012 as a<br>reference | Post-impact phase    |                           | Adjusted OR<br>(95% CI) with<br>2010/2012 as a<br>reference |
|-------------------------------------------|---------------------|---------------------------|-------------------------------------------------------------|----------------------|---------------------------|-------------------------------------------------------------|
|                                           | 2011<br>(N = 9,696) | 2010/2012<br>(N = 17,985) |                                                             | 2011<br>(N = 14,024) | 2010/2012<br>(N = 26,899) |                                                             |
| BCPR rate, No. (%)                        | 3,907 (40.3)        | 7,263 (40.4)              | 0.96 (0.91–1.02)                                            | 5,801 (41.4)         | 11,059 (41.1)             | 1.01 (0.96–1.05)                                            |
| 1-month survival, No. (%)                 | 805 (8.3)           | 1,509 (8.4)               | 1.00 (0.91–1.10)                                            | 1,146 (8.2)          | 2,120 (7.9)               | 1.02 (0.94–1.10)                                            |
| Neurologically favorable outcome, No. (%) | 413 (4.3)           | 735 (4.1)                 | 1.07 (0.93–1.22)                                            | 557 (4.0)            | 1,056 (3.9)               | 1.01 (0.90–1.13)                                            |

BCPR, bystander cardiopulmonary resuscitation; impact phase, 0-23 weeks from March 11;

post-impact phase, from 24 weeks after March 11 until March 11 of the following year; OR, odds ratio; CI, confidence interval.

**Supplemental Table 3** Phasic comparisons of indices for dispatcher-assisted and bystander-initiated resuscitation efforts between 2011 and 2010/2012 in non-affected prefectures

| Indices related to DA-CPR and BCPR              | Impact phase       |                     | Unadjusted OR (95% CI) with 2010/2012 as a reference | Post-impact phase   |                      | Unadjusted OR (95% CI) with 2010/2012 as a reference |
|-------------------------------------------------|--------------------|---------------------|------------------------------------------------------|---------------------|----------------------|------------------------------------------------------|
|                                                 | 2011               | 2010/2012           |                                                      | 2011                | 2010/2012            |                                                      |
| DA-CPR sensitivity, No./total (%)               | 4,882/8,834 (55.3) | 8,833/16,350 (54.0) | 1.05 (0.99–1.11)                                     | 7,139/12,788 (55.8) | 13,640/24,565 (55.5) | 1.05 (0.99–1.11)                                     |
| Bystander's compliance to DA-CPR, No./total (%) | 3,041/4,882 (62.3) | 5,628/8,833 (63.7)  | 0.94 (0.88–1.01)                                     | 8,725/13,640 (63.9) | 8,725/13,640 (64.0)  | 1.00 (0.94–1.06)                                     |
| Voluntary performance of BCPR, No./total (%)    | 862/4,814 (17.9)   | 1,635/9,152 (17.9)  | 1.00 (0.92–1.10)                                     | 1,236/6,885 (18.0)  | 2,334/13,259 (17.6)  | 1.02 (0.95–1.11)                                     |

DA-CPR, dispatcher-assisted cardiopulmonary resuscitation; BCPR, bystander cardiopulmonary resuscitation; impact phase, 0-23 weeks from March 11; post-impact phase, from 24 weeks after March 11 until March 11 of the following year; OR, odds ratio; CI, confidence interval.

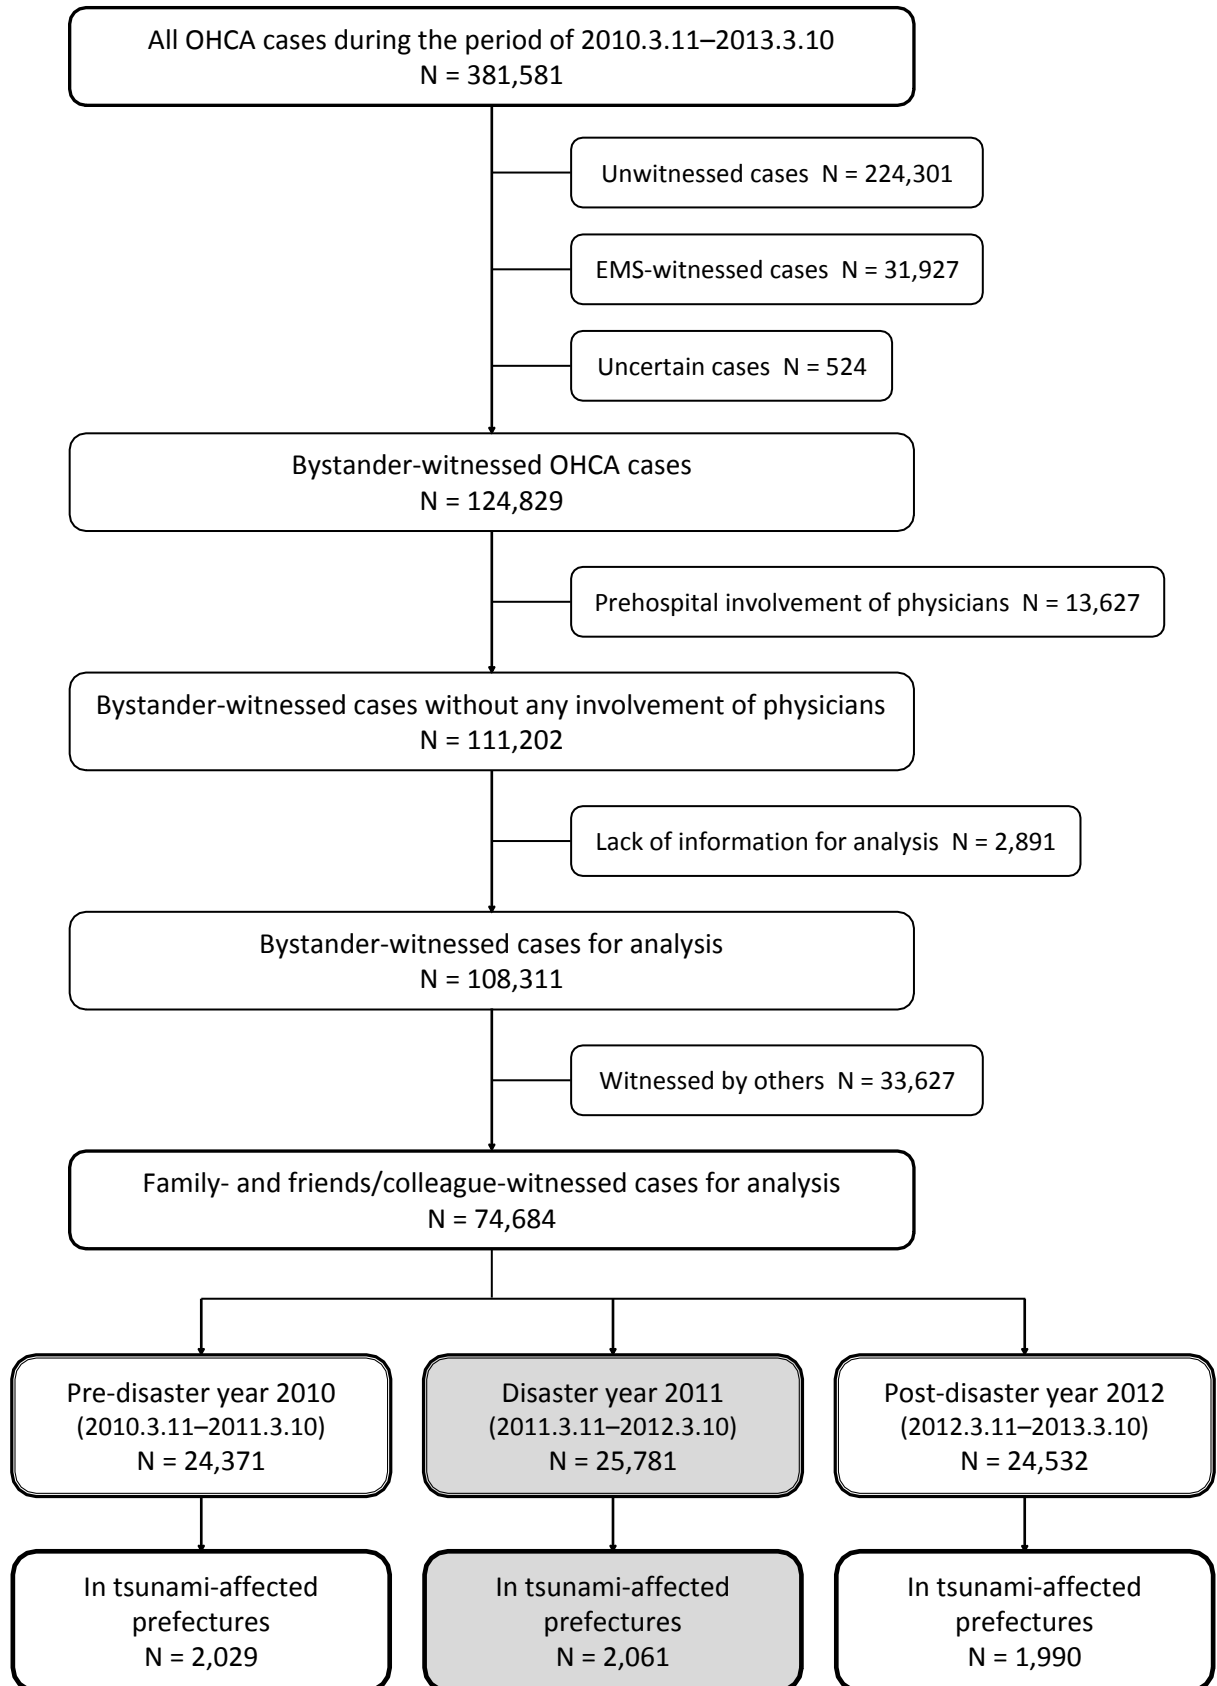

Figure 2

**A. Tsunami-affected prefectures (5 prefectures)**

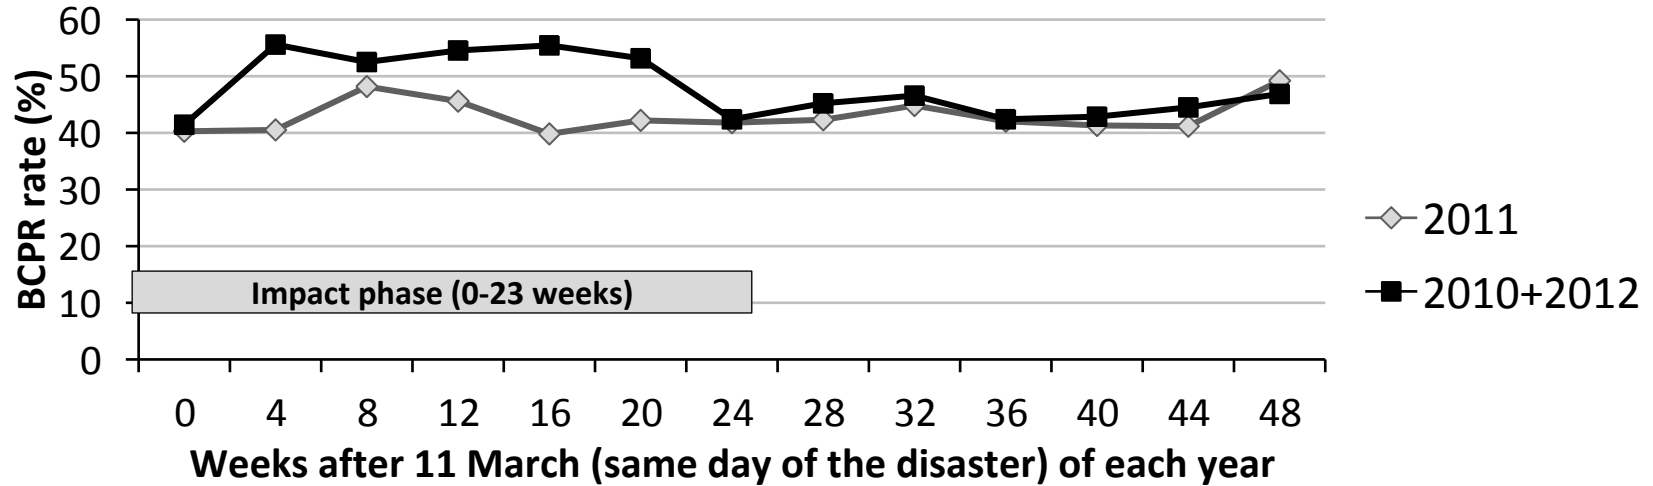

**B. Other prefectures (42 prefectures)**

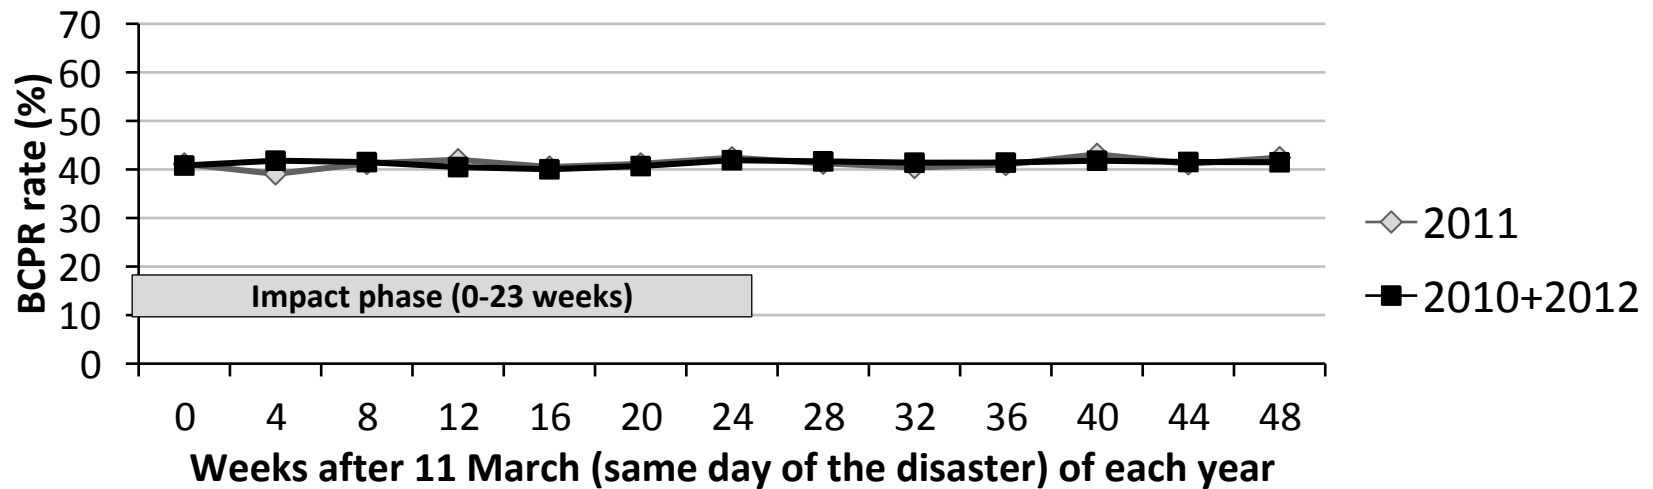

1  
2  
3  
4  
5  
6  
7  
8  
9  
10  
11  
12  
13  
14  
15  
16  
17  
18  
19  
20  
21  
22  
23  
24  
25  
26  
27  
28  
29  
30  
31  
32  
33  
34  
35  
36  
37  
38  
39  
40  
41

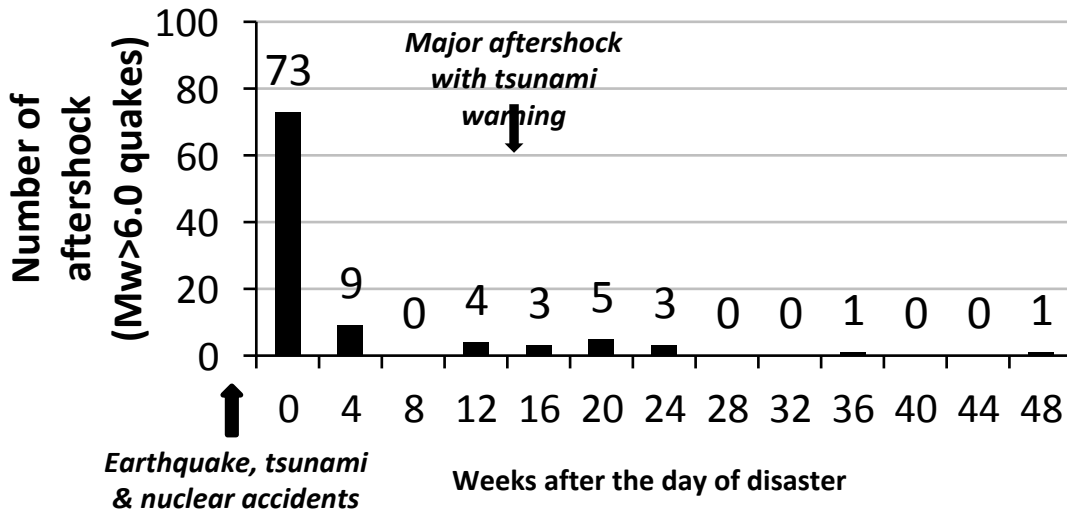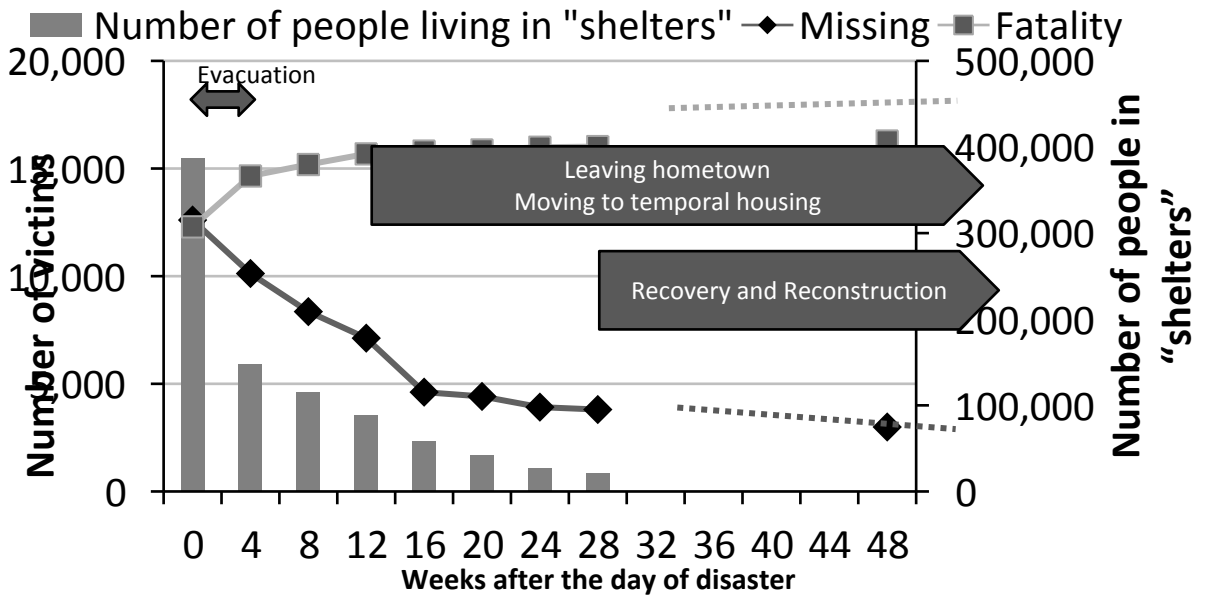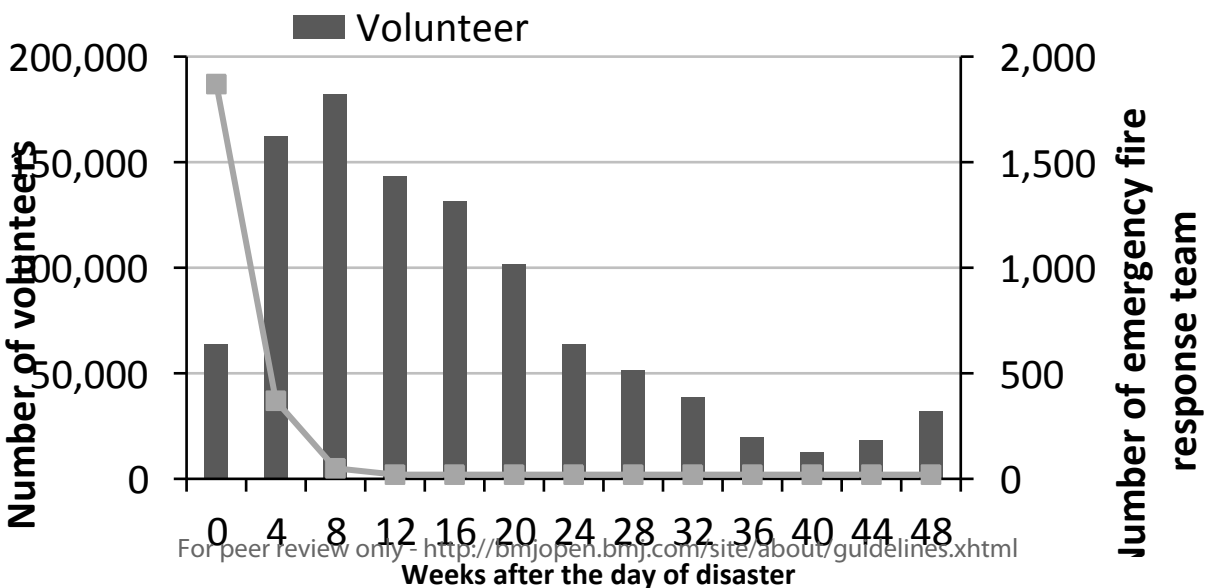

# BMJ Open

**Effect of large-scale disasters on bystander-initiated cardiopulmonary resuscitation in family-, friend-, and colleague-witnessed out-of-hospital cardiac arrest: a retrospective analysis of prospectively collected, nationwide, population-based data**

|                                 |                                                                                                                                                                                                                                                                                                                                                                                                                                                                                                                                                                                                                                                                                                  |
|---------------------------------|--------------------------------------------------------------------------------------------------------------------------------------------------------------------------------------------------------------------------------------------------------------------------------------------------------------------------------------------------------------------------------------------------------------------------------------------------------------------------------------------------------------------------------------------------------------------------------------------------------------------------------------------------------------------------------------------------|
| Journal:                        | <i>BMJ Open</i>                                                                                                                                                                                                                                                                                                                                                                                                                                                                                                                                                                                                                                                                                  |
| Manuscript ID                   | bmjopen-2021-055640.R1                                                                                                                                                                                                                                                                                                                                                                                                                                                                                                                                                                                                                                                                           |
| Article Type:                   | Original research                                                                                                                                                                                                                                                                                                                                                                                                                                                                                                                                                                                                                                                                                |
| Date Submitted by the Author:   | 04-Jan-2022                                                                                                                                                                                                                                                                                                                                                                                                                                                                                                                                                                                                                                                                                      |
| Complete List of Authors:       | Ushimoto, Tomoyuki; Kanazawa Medical University, Emergency Medicine<br>Takada, Kohei; Kanazawa University Graduate School of Medical Sciences, Department of Circulatory Emergency and Resuscitation Science<br>Yamashita, Akira; Kanazawa University Graduate School of Medical Sciences, Department of Circulatory Emergency and Resuscitation Science; Noto General Hospital, Department of Cardiology<br>Morita, Hideki; Kanazawa Medical University, Department of Emergency Medicine<br>Wato, Yukihiko; Kanazawa Medical University, Emergency medicine<br>Inaba, Hideo; Kanazawa Medical University, Emergency Medicine;<br>Kanazawa Medical University, Department of Emergency Medicine |
| <b>Primary Subject Heading</b>: | Emergency medicine                                                                                                                                                                                                                                                                                                                                                                                                                                                                                                                                                                                                                                                                               |
| Secondary Subject Heading:      | Emergency medicine, Medical education and training, Mental health, Public health                                                                                                                                                                                                                                                                                                                                                                                                                                                                                                                                                                                                                 |
| Keywords:                       | ACCIDENT & EMERGENCY MEDICINE, EDUCATION & TRAINING (see Medical Education & Training), MEDICAL EDUCATION & TRAINING, PUBLIC HEALTH                                                                                                                                                                                                                                                                                                                                                                                                                                                                                                                                                              |
|                                 |                                                                                                                                                                                                                                                                                                                                                                                                                                                                                                                                                                                                                                                                                                  |

SCHOLARONE™  
Manuscripts





I, the Submitting Author has the right to grant and does grant on behalf of all authors of the Work (as defined in the below author licence), an exclusive licence and/or a non-exclusive licence for contributions from authors who are: i) UK Crown employees; ii) where BMJ has agreed a CC-BY licence shall apply, and/or iii) in accordance with the terms applicable for US Federal Government officers or employees acting as part of their official duties; on a worldwide, perpetual, irrevocable, royalty-free basis to BMJ Publishing Group Ltd ("BMJ") its licensees and where the relevant Journal is co-owned by BMJ to the co-owners of the Journal, to publish the Work in this journal and any other BMJ products and to exploit all rights, as set out in our [licence](#).

The Submitting Author accepts and understands that any supply made under these terms is made by BMJ to the Submitting Author unless you are acting as an employee on behalf of your employer or a postgraduate student of an affiliated institution which is paying any applicable article publishing charge ("APC") for Open Access articles. Where the Submitting Author wishes to make the Work available on an Open Access basis (and intends to pay the relevant APC), the terms of reuse of such Open Access shall be governed by a Creative Commons licence – details of these licences and which [Creative Commons](#) licence will apply to this Work are set out in our licence referred to above.

Other than as permitted in any relevant BMJ Author's Self Archiving Policies, I confirm this Work has not been accepted for publication elsewhere, is not being considered for publication elsewhere and does not duplicate material already published. I confirm all authors consent to publication of this Work and authorise the granting of this licence.

1  
2  
3  
4 **Effect of large-scale disasters on bystander-initiated cardiopulmonary resuscitation in**  
5  
6 **family-, friend-, and colleague-witnessed out-of-hospital cardiac arrest: a retrospective**  
7  
8 **analysis of prospectively collected, nationwide, population-based data**  
9  
10  
11  
12  
13  
14

15 Tomoyuki Ushimoto, MD, PhD<sup>1</sup> (0000-0002-9060-9391), Kohei Takada, BA<sup>2</sup>, Akira

16 Yamashita, MD, PhD<sup>2,3</sup>, Hideki Morita, MD<sup>1</sup>, Yukihiro Wato, MD, PhD<sup>1</sup>, Hideo Inaba, MD,  
17  
18  
19  
20  
21  
22 PhD<sup>1,4</sup>  
23  
24  
25  
26  
27

28 <sup>1</sup>Department of Emergency Medicine, Kanazawa Medical University, Uchinada, Japan

29  
30 <sup>2</sup>Department of Circulatory Emergency and Resuscitation Science, Kanazawa University  
31  
32  
33  
34 Graduate School of Medicine, Kanazawa, Japan  
35

36  
37 <sup>3</sup>Department of Cardiology, Noto General Hospital, Nanao, Japan  
38

39  
40 <sup>4</sup>Kanazawa University, Kanazawa, Japan  
41  
42  
43  
44  
45

46 E-mail addresses:

47  
48 TU; ushi@kanazawa-med.ac.jp, KT; tatatakakadadada612@yahoo.co.jp, AY;

49  
50  
51 yamashita@noto-hospital.jp, HM; moririn@p2223.nsk.ne.jp, YW;

52  
53  
54 allstar@kanazawa.med.ac.jp, HI; mauriakoi@ybb.ne.jp  
55  
56  
57  
58  
59  
60

\*Address for correspondence:

1  
2  
3  
4 Tomoyuki Ushimoto, MD, PhD, Assistant Professor of Emergency Medicine, Kanazawa  
5

6  
7 Medical University  
8

9  
10 1-1 Daigaku, Uchinada-machi, Kahoku-gun, Ishikawa, 920-0293, Japan  
11

12  
13 Phone: +81-76-218-8445  
14

15  
16 FAX: +81-76-286-1635  
17

18  
19 E-mail: [ushi@kanazawa-med.ac.jp](mailto:ushi@kanazawa-med.ac.jp)  
20  
21  
22  
23

24  
25 Total word count (excluding title, abstract, acknowledgment, references, tables, and figure  
26  
27 legends): 2831  
28

29  
30 Number of Tables: 3  
31

32  
33 Number of Figures: 2  
34

35  
36 Number of Supplementary Tables: 3  
37

38  
39 Number of Supplementary Figures: 1  
40

41  
42 Number of References: 35  
43  
44  
45  
46  
47  
48  
49  
50  
51  
52  
53  
54  
55  
56  
57  
58  
59  
60

## ABSTRACT

**Importance:** The effect of large-scale disasters on bystander cardiopulmonary resuscitation (BCPR) performance is unknown.

**Objective:** To investigate whether and how large-scale earthquake and tsunami as well as subsequent nuclear pollution influenced BCPR performance for out-of-hospital cardiac arrest (OHCA) witnessed by family and friends/colleagues.

**Design & Setting:** Retrospective analysis of prospectively collected, nationwide, population-based data for OHCA cases.

**Participants:** From the nationwide OHCA registry recorded between March 11, 2010, and March 10, 2013, we extracted 74,684 family- and friend/colleague-witnessed OHCA cases without prehospital physician involvement.

**Exposure:** Earthquake and tsunamis that were followed by nuclear pollution and largely affected the social life of citizens for at least 24 weeks.

**Main Outcome and Measure:** Neurologically favorable outcome after 1 month, 1-month survival, and BCPR.

**Methods:** We analyzed the 4-week average trend of BCPR rates in the years affected and before and after the disaster. We used univariate and multivariate logistic regression analyses to investigate whether these disasters affected BCPR and OHCA results.

**Results:** Multivariable logistic regression for tsunami-affected prefectures revealed that the BCPR rate during the impact phase in 2011 was significantly lower than that in 2010/2012

(42.5% vs. 48.2%; adjusted odds ratio; 95% confidence interval, 0.82; 0.68–0.99). A lower level of bystander compliance with dispatcher-assisted CPR instructions (62.1% vs. 69.5%, 0.72; 0.57–0.92) in the presence of a preserved level of voluntary BCPR performance (23.6% vs. 23.8%) was also observed. Both 1-month survival and neurologically favorable outcome rates during the impact phase in 2011 were significantly poorer than those in 2010/2012 (8.5% vs. 10.7%, 0.72; 0.52–0.99, 4.0% vs. 5.2%, 0.62; 0.38–0.98, respectively).

**Conclusion and Relevance:** A large-scale disaster with nuclear pollution influences BCPR performance and clinical outcomes of OHCA witnessed by family and friends/colleagues. Basic life-support training leading to voluntary-initiated BCPR might serve as preparedness for disaster and major accidents.

(Word count: 299)

### Strengths and limitations of this study

We studied the effects of large-scale disasters such as the Great East Japan Earthquake on the performance of bystander cardiopulmonary resuscitation (BCPR).

Analysis was performed using the 381,581 national OHCA cases in the All-Japan Utstein Registry of the Fire and Disaster Management Agency (FDMA) of Japan recorded between March 11, 2010 and March 10, 2013.

The primary outcome was the provision of BCPR by family or friends / colleagues, and the secondary outcomes were 1-month survival and neurologically favorable outcome after 1

1  
2  
3  
4 month.

5  
6  
7 **What is already known on this topic**

8  
9  
10 Large-scale disasters or catastrophes may psychologically affect the social behavior of  
11  
12 citizens for a long duration.

13  
14  
15 Disasters are known to temporarily increase the incidence of cardiovascular events and other  
16  
17 acute illnesses that may lead to out-of-hospital cardiac arrest (OHCA).  
18

19  
20  
21 The outcomes of OHCA depend on dispatcher-assisted and bystander-initiated resuscitation  
22  
23 efforts and on initial basic life-support (BLS) actions by bystanders who witness OHCA.  
24  
25

26  
27  
28  
29  
30 **What this study adds**

31  
32  
33 A large-scale disaster with nuclear pollution influences the BCPR performance and clinical  
34  
35 outcomes of OHCA witnessed by family and friends/colleagues.  
36  
37

38  
39  
40 BLS training that leads to voluntary-initiated BCPR might serve as preparedness for disaster  
41  
42 and major accidents.  
43  
44  
45  
46  
47  
48  
49  
50  
51  
52  
53  
54  
55  
56  
57  
58  
59  
60

## Introduction

The Great East Japan Earthquake swept the North-East Pacific coast of the Japanese mainland on March 11, 2011, and an earthquake-generated tsunami destroyed cities, towns, and villages located at the North-East Pacific coast, resulting in the Fukushima Dai-ichi nuclear accident. This disaster forced citizens in afflicted areas to spend a long period as evacuees.<sup>1,2</sup> A considerable number of major aftershocks with and without a tsunami warning (moment magnitude  $\geq 6.0$ ) occurred for 24 weeks after the main disaster (Supplemental Figure, upper panel).<sup>3</sup> After evacuation of survivors living in tsunami-affected areas, more than 15,000 people lived temporarily in “shelters” and eventually moved into temporary housing areas, leaving their hometowns. The search for missing people continued for 24 weeks after the disaster. Based on a survey conducted on June 10, 2020, the final number of victims was 22,167, comprising 19,638 fatalities, which included 3,739 disaster-related deaths and 2,529 missing people (Supplemental Figure, middle panel).<sup>2</sup> Several emergency fire response teams and volunteers provided disaster services in the tsunami-affected prefectures (Supplemental Figure, lower panel). Reconstruction of the destroyed towns and cities with resumption of farming and fishery industries began only around 24 weeks after the disaster.<sup>4</sup> Several aspects of this disaster have been reviewed over the past 10 years following the disaster.<sup>2</sup>

Large-scale disasters or catastrophes may psychologically affect the social behavior of citizens.<sup>5,6</sup> Disasters are known to temporally increase the incidence of cardiovascular

1  
2  
3  
4 events and other acute illnesses that may lead to out-of-hospital cardiac arrest (OHCA).<sup>7-9</sup>

5  
6  
7 The outcomes of OHCA depend on dispatcher-assisted and bystander-initiated resuscitation  
8  
9 efforts and on initial basic life-support (BLS) actions by bystanders who witness OHCA.<sup>10</sup>

10  
11  
12 The Fukushima nuclear pollution disaster and the large-scale pandemic such as coronavirus  
13  
14 disease 2019 (COVID-19) may augment the level of general fear of pollution and infection in  
15  
16 the population, which might discourage BCPR.<sup>11,12</sup> However, the impact of large-scale  
17  
18 disasters on BCPR actions of laypersons is unknown. This study aimed to investigate whether  
19  
20 and how the 2011 earthquake influenced the bystander cardiopulmonary resuscitation  
21  
22 (BCPR) and outcomes in OHCA cases witnessed by family, friends, and colleagues in the  
23  
24 prefectures that were most affected by the earthquake.  
25  
26  
27  
28  
29  
30  
31  
32  
33  
34  
35  
36

## 37 **Methods**

### 38 *Data selection and grouping*

39  
40 From the 381,581 nationwide OHCA cases in the All-Japan Utstein-style<sup>13</sup> Registry of the  
41  
42 Japanese Fire and Disaster Management Agency, recorded between March 11, 2010 and  
43  
44 March 10, 2013, we extracted 108,311 bystander-witnessed cases that did not involve any  
45  
46 physician and excluded 2,891 cases that lacked information for analysis. After the disaster,  
47  
48 many healthcare providers visited the site. Also, there were many healthcare providers in  
49  
50 evacuation shelters and temporary housing. Therefore, we extracted 74,684 family- and  
51  
52 friend/colleague-witnessed OHCA cases, excluding cases witnessed by others, to minimize  
53  
54  
55  
56  
57  
58  
59  
60



1  
2  
3  
4 the effect of healthcare providers volunteering for and/or being involved in disaster medical  
5  
6  
7 support (Figure 1). The study period included the predisaster year 2010 (2010.3.11–  
8  
9  
10 2011.3.10), disaster year 2011 (2011.3.11–2012.3.10), and postdisaster year 2012  
11  
12  
13 (2012.3.11–2013.3.10). Tsunami-affected prefectures, defined as prefectures in which a  
14  
15  
16 tsunami with a maximum height of >4 meters was observed, included five prefectures located  
17  
18  
19 in the North-East Pacific coast of the Japanese mainland: Aomori, Iwate, Miyagi, Fukushima,  
20  
21  
22 and Ibaraki prefectures.<sup>1</sup> The prefectures other than these five tsunami-affected prefectures  
23  
24  
25 were designated as other prefectures.

26  
27  
28 On the basis of the occurrence of aftershocks, number of evacuees in evacuation centers, and  
29  
30  
31 resumption of social activities, we determined that 0–23 weeks from March 11, 2011 was the  
32  
33  
34 period affected by the disaster. We defined the same period from 2010 to 2012 as the impact  
35  
36  
37 phase.

### 42 *Outcome measures*

43  
44  
45 The primary outcome of this study was provision of BCPR by a family member or a  
46  
47  
48 friend/colleague. The secondary outcomes were a neurologically favorable outcome after 1  
49  
50  
51 month, defined as a cerebral performance category score of 1 (good recovery) or 2 (moderate  
52  
53  
54 disability)<sup>14</sup> and 1-month survival.

### 56 57 58 59 60 *Data analysis*

1  
2  
3  
4 To investigate the validity of the impact phase definition, we analyzed the 4-week average  
5  
6 trends in the BCPR rate after the day of disaster in the year 2011 and on the same day (11  
7  
8 March) in the predisaster year of 2010 and postdisaster year of 2012 in the tsunami-affected  
9  
10 and other prefectures.  
11  
12  
13  
14

15  
16 The influence of disaster on BCPR and OHCA outcomes in the tsunami-affected  
17  
18 prefectures were investigated using univariate and multivariable logistic regression analyses.  
19  
20  
21 The BCPR rates, 1-month survival rates, and neurologically favorable 1-month outcomes  
22  
23 were compared between the disaster year (2011) and the predisaster/postdisaster years  
24  
25 (2010/2012) during the impact and the postimpact phases in tsunami-affected and other  
26  
27 prefectures.  
28  
29  
30  
31  
32

33  
34 Bystanders exhibit four patterns of behavior against OHCA: BCPR following DA-  
35  
36 CPR instruction, bystander-initiated BCPR without DA-CPR, no BCPR despite DA-CPR,  
37  
38 and no BCPR without DA-CPR. Furthermore, to clarify the association of the impact phase  
39  
40 with dispatcher-assisted and bystander-initiated resuscitation efforts, we calculated the  
41  
42 following three indices related to dispatcher-assisted CPR (DA-CPR) and BCPR in  
43  
44 accordance with a previous report<sup>15</sup>: 1) sensitivity of DA-CPR for OHCA (=the number of  
45  
46 cases for which DA-CPR was attempted divided by the number of cases that did not receive  
47  
48 bystander-initiated BCPR without DA-CPR); 2) proportion of bystanders to follow DA-CPR  
49  
50 (=the number of cases that received BCPR following DA-CPR divided by the number of  
51  
52 cases for which DA-CPR was attempted); and 3) bystander's own performance of BCPR for  
53  
54  
55  
56  
57  
58  
59  
60

1  
2  
3  
4 OHCA (=the number of cases that received bystander-initiated BCPR without DA-CPR  
5  
6 divided by the number of cases for which DA-CPR was not attempted).<sup>10,16</sup>  
7  
8

9  
10 Univariate analyses were performed using the chi-square test or Fisher's exact  
11  
12 probability test for nominal variables. Because the continuous variables analyzed in this study  
13  
14 did not show a normal distribution, the Mann–Whiney *U*-test was applied for continuous  
15  
16 variables. Multivariable logistic regression analysis for BCPR provision included the factors,  
17  
18 which were well known to be associated with BCPR provision: daytime, weekend, patient  
19  
20 sex and age, etiology of OHCA (presumed cardiac or not, exogenous origin), family  
21  
22 bystander, and DA-CPR instruction. Factors included in multivariable logistic regression  
23  
24 analysis for outcomes were daytime, patient sex and age, presumed cardiac etiology, initial  
25  
26 rhythm (shockable or not), BCPR provision, family bystander, tracheal intubation and  
27  
28 epinephrine administration by paramedics, time interval between witness and emergency call,  
29  
30 and time interval between emergency call and emergency medical service (EMS) arrival at  
31  
32 patients (EMS response time). All tests were two-tailed, and we considered a probability (P)  
33  
34 value < 0.05 to be statistically significant. All statistical analyses were performed using the  
35  
36 JMP Pro 15 software (SAS Institute, Cary, NC).  
37  
38  
39  
40  
41  
42  
43  
44  
45  
46  
47  
48  
49

#### 50 51 52 53 54 *Patient and Public involvement*

55  
56  
57 Patients or the public were not involved in the design, conduct, reporting, or dissemination  
58  
59 plans of our study.  
60

## Results

### *Number of family- and friends/colleague-witnessed OHCA cases in the tsunami-affected prefectures and other prefectures*

A total of 74,684 family- and friends/colleague-witnessed OHCA cases were extracted and analyzed. Among these, the number of family- and friends/colleague-witnessed OHCA cases in the tsunami-affected prefectures was 2061 for the disaster year 2011 and 4019 for 2010/2012. The number of family- and friends/colleague-witnessed OHCA cases in other prefectures was 23720 for 2011 and 44884 for 2010/2012 (Figure 1, lower part). The number of family- and friends/colleague-witnessed OHCA cases during the impact phase was 882 for the disaster year 2011 and 1,565 for 2010/2012 in the tsunami-affected prefectures, whereas it was 9696 for 2011 and 17,985 for 2010/2012 in other prefectures.

### *Validity of the impact phase definition (4-week average trends in BCPR provision after the day of disaster)*

The trends in the BCPR rate in 2011 (disaster year) differed from those in 2010/2012 (predisaster and postdisaster years) in the tsunami-affected prefectures (Figure 2, upper panel). In 2010/2012, the BCPR rate remained high (>50%) during weeks 4–23 (corresponding to the spring and summer seasons) whereas it was low (nearly 40%) during weeks 36–43 (winter season) (P for trend: <0.01). However, the BCPR rate remained low

1  
2  
3  
4 except for weeks 8–15 after the disaster, and no seasonal variations were observed in 2011 (P  
5  
6  
7 for trend: 0.83). The impact phase coincided with the period during which the differences in  
8  
9  
10 the 4-week averages of BCPR between 2011 and 2010/2012 were recognized in the tsunami-  
11  
12  
13 affected prefectures.

14  
15  
16 On the other hand, in other prefectures (the tsunami-not-affected prefectures), the  
17  
18  
19 trend of BCPR rate was the same in 2011 (year of disaster) and 2010/2012. The BCPR rate  
20  
21  
22 remained at nearly 40% throughout the 3 years, regardless of the impact phase of the disaster  
23  
24  
25 (before and after the disaster; Figure 2, lower panel). Furthermore, there were no obvious  
26  
27  
28 seasonal variations (P for trend: 0.43 in 2011 and 0.96 in 2010/2012).

29  
30  
31 The average rates of BCPR during the impact phase were 42.5% (375/882) for the  
32  
33  
34 disaster year 2011 and 48.2% (754/1,565) for 2010/2012 in Tsunami-affected prefectures and  
35  
36  
37 40.3% (3,907/9,696) for 2011 and 40.2% (7,263/17,985) for 2010/2012 in other prefectures.

38  
39  
40  
41  
42  
43 *Differences in the backgrounds and characteristics of OHCA between the disaster year and*  
44  
45  
46 *the pre-disaster/post-disaster years*

47  
48  
49 In the tsunami-affected prefectures, during the impact phase, the incidence of OHCA during  
50  
51  
52 weekends and the proportion of cases of presumed cardiac etiology in 2011 were higher than  
53  
54  
55 those in 2010/2012, whereas the rate of DA-CPR was lower. As expected, transportation time  
56  
57  
58 from the scene to the hospital was prolonged in 2011. During the post-impact phase, there was  
59  
60  
no significant difference in backgrounds between 2011 and 2010/2012 (Table 1).

1  
2  
3  
4 In other prefectures, significant differences in some prehospital confounders were  
5  
6  
7 observed between 2011 and 2010/2012 during the impact and postimpact phases. However,  
8  
9  
10 the differences in these parameters were very small (Supplemental Table 1).  
11  
12  
13  
14  
15  
16  
17  
18  
19  
20  
21  
22  
23  
24  
25  
26  
27  
28  
29  
30  
31  
32  
33  
34  
35  
36  
37  
38  
39  
40  
41  
42  
43  
44  
45  
46  
47  
48  
49  
50  
51  
52  
53  
54  
55  
56  
57  
58  
59  
60

For peer review only

**Table 1** Background, characteristics, and time factors of family- and friend/colleague-witnessed out-of-hospital cardiac arrest cases in tsunami-affected prefectures

| Background, characteristics, and time factors     | Impact phase   |                       | Unadjusted OR (95% CI) <sup>a)</sup> or P-value | Postimpact phase |                       | Unadjusted OR (95% CI) <sup>a)</sup> or P-value |
|---------------------------------------------------|----------------|-----------------------|-------------------------------------------------|------------------|-----------------------|-------------------------------------------------|
|                                                   | 2011 (N = 882) | 2010/2012 (N = 1,565) |                                                 | 2011 (N = 1,179) | 2010/2012 (N = 2,454) |                                                 |
| Family-witnessed patients, No. (%)                | 783 (88.8)     | 1,404 (89.7)          | 0.91 (0.70–1.18)                                | 1,074 (91.1)     | 2,219 (90.4)          | 1.08 (0.85–1.38)                                |
| Daytime (7:00 a.m.–7:00 p.m.), No. (%)            | 520 (59.0)     | 950 (60.7)            | 0.93 (0.79–1.10)                                | 682 (57.9)       | 1,485 (60.5)          | 0.90 (0.79–1.03)                                |
| Weekend, No. (%)                                  | 141 (16.0)     | 192 (12.3)            | <b>1.36 (1.08–1.72)</b>                         | 146 (12.4)       | 338 (13.8)            | 0.89 (0.72–1.09)                                |
| Age, median (IQR), y                              | 78 (65–84)     | 76 (63–84)            | 0.12                                            | 77 (66–84)       | 78 (67–85)            | 0.17                                            |
| Male patient, No. (%)                             | 598 (67.8)     | 1,002 (64.0)          | 1.18 (1.00–1.41)                                | 734 (62.3)       | 1,525 (62.1)          | 1.01 (0.87–1.16)                                |
| Presumed cardiac etiology, No. (%)                | 554 (62.8)     | 877 (56.0)            | <b>1.33 (1.12–1.57)</b>                         | 725 (61.5)       | 1,443 (58.8)          | 1.12 (0.97–1.29)                                |
| Exogenous origin <sup>b)</sup> , No. (%)          | 102 (11.6)     | 206 (13.2)            | 0.86 (0.67–1.11)                                | 118 (10.0)       | 259 (10.6)            | 0.94 (0.75–1.19)                                |
| Shockable initial rhythm, No. (%)                 | 162 (18.4)     | 271 (17.3)            | 1.07 (0.87–1.33)                                | 185 (15.7)       | 345 (14.1)            | 1.14 (0.94–1.38)                                |
| Dispatcher-assisted CPR, No. (%)                  | 433 (49.1)     | 835 (53.4)            | <b>0.84 (0.72–0.99)</b>                         | 598 (50.7)       | 1,240 (50.5)          | 1.01 (0.88–1.16)                                |
| Defibrillation by bystanders with an AED, No. (%) | 4 (0.5)        | 9 (0.6)               | 0.79 (0.24–2.58)                                | 11 (0.9)         | 12 (0.6)              | 1.65 (0.73–3.75)                                |
| Epinephrine administration by paramedics, No. (%) | 153 (17.4)     | 256 (16.4)            | 1.07 (0.86–1.34)                                | 231 (19.6)       | 448 (19.7)            | 1.00 (0.84–1.19)                                |
| Tracheal intubation by paramedics, No. (%)        | 78 (8.8)       | 161 (10.3)            | 0.85 (0.64–1.12)                                | 103 (8.7)        | 251 (10.2)            | 0.84 (0.66–1.07)                                |
| Time intervals, median (IQR), min                 |                |                       |                                                 |                  |                       |                                                 |
| Witness-to-emergency call                         | 2 (0–5)        | 2 (0–5)               | 0.71                                            | 2 (0–5)          | 2 (0–5)               | 0.49                                            |
| EMS response time <sup>c)</sup>                   | 8 (7–11)       | 9 (7–11)              | 0.45                                            | 9 (7–11)         | 9 (7–12)              | 0.11                                            |
| EMS arrival at patient-to-arrival at the hospital | 21 (16–28)     | 20 (15–27)            | <b>&lt; 0.05</b>                                | 22 (16–29)       | 22 (16–29)            | 0.74                                            |

OR, odds ratio; CI, confidence interval; IQR, interquartile range; CPR, cardiopulmonary resuscitation; AED, automated external defibrillator;

EMS, emergency medical service; impact phase, 0–23 weeks from March 11;

postimpact phase, from 24 weeks after March 11 until March 11 of the following year

a) 2010/2012 as a reference

b) Asphyxia, submersion, hypothermia, poisoning, and trauma

c) Time interval between emergency call and EMS arrival at patient

**Supplemental Table 1** Background, characteristics, and time factors of family- and friend/colleague-witnessed out-of-hospital cardiac arrest cases in non-affected prefectures

| Background, characteristics, and time factors     | Impact phase     |                        | Unadjusted OR (95% CI) <sup>a)</sup> or P-value | Postimpact phase  |                        | Unadjusted OR (95% CI) <sup>a)</sup> or P-value |
|---------------------------------------------------|------------------|------------------------|-------------------------------------------------|-------------------|------------------------|-------------------------------------------------|
|                                                   | 2011 (N = 9,696) | 2010/2012 (N = 17,985) |                                                 | 2011 (N = 14,024) | 2010/2012 (N = 26,899) |                                                 |
| Family-witnessed patients, No. (%)                | 8,771 (90.5)     | 16,211 (90.1)          | 1.04 (0.95–1.13)                                | 12,679 (90.4)     | 24,452 (90.9)          | 0.94 (0.88–1.01)                                |
| Daytime (7:00 a.m.–7:00 p.m.), No. (%)            | 5,741 (59.2)     | 10,653 (59.2)          | 1.00 (0.95–1.05)                                | 8,285 (59.1)      | 16,124 (59.9)          | 0.97 (0.93–1.01)                                |
| Weekend, No. (%)                                  | 1,362 (14.1)     | 2,424 (13.5)           | 1.05 (0.98–1.13)                                | 1,971 (14.1)      | 3,659 (13.6)           | 1.04 (0.98–1.10)                                |
| Age, median (IQR), y                              | 77 (66–85)       | 77 (66–85)             | 0.57                                            | 77 (66–85)        | 78 (67–85)             | 0.05                                            |
| Male patient, No. (%)                             | 6,113 (63.1)     | 11,429 (63.6)          | 0.98 (0.93–1.03)                                | 8,846 (63.1)      | 16,795 (62.4)          | 1.03 (0.99–1.07)                                |
| Presumed cardiac etiology, No. (%)                | 5,661 (58.4)     | 10,483 (58.3)          | 1.00 (0.96–1.06)                                | 8,220 (58.6)      | 16,085 (59.8)          | <b>0.95 (0.91–0.99)</b>                         |
| Exogenous origin <sup>b)</sup> , No. (%)          | 1,232 (12.7)     | 2,202 (12.2)           | 1.04 (0.97–1.12)                                | 1,709 (12.2)      | 2,845 (10.6)           | <b>1.17 (1.10–1.25)</b>                         |
| Shockable initial rhythm, No. (%)                 | 1,399 (14.4)     | 2,598 (14.5)           | 1.00 (0.93–1.07)                                | 1,979 (14.1)      | 3,676 (13.7)           | 1.04 (0.98–1.10)                                |
| Dispatcher-assisted CPR, No. (%)                  | 4,882 (50.4)     | 8,833 (49.1)           | 1.05 (1.00–1.10)                                | 7,139 (50.9)      | 13,640 (50.7)          | 1.01 (0.97–1.05)                                |
| Defibrillation by bystanders with an AED, No. (%) | 67 (0.7)         | 145 (0.8)              | 0.60 (0.64–1.15)                                | 101 (0.7)         | 197 (0.8)              | 0.91 (0.72–1.16)                                |
| Epinephrine administration by paramedics, No. (%) | 2,097 (21.6)     | 3,891 (21.6)           | 1.00 (0.94–1.06)                                | 3,084 (22.0)      | 6,106 (23.5)           | <b>0.92 (0.88–0.97)</b>                         |
| Tracheal intubation by paramedics, No. (%)        | 845 (8.7)        | 1,697 (9.4)            | <b>0.92 (0.84–0.99)</b>                         | 1,246 (8.9)       | 2,500 (9.3)            | 0.95 (0.89–1.02)                                |
| Time intervals, median (IQR), min                 |                  |                        |                                                 |                   |                        |                                                 |
| Witness-to-emergency call                         | 2 (0–5)          | 2 (0–5)                | <b>&lt;0.005</b>                                | 2 (0–5)           | 2 (0–5)                | 0.24                                            |
| EMS response time <sup>c)</sup>                   | 8 (7–11)         | 8 (7–10)               | 0.10                                            | 8 (7–11)          | 8 (7–11)               | 0.86                                            |
| Arrival at the patient-to-arrival at the hospital | 23 (18–30)       | 23 (18–30)             | 0.08                                            | 23 (18–30)        | 24 (18–31)             | <b>&lt;0.01</b>                                 |

IQR, interquartile range; CPR, cardiopulmonary resuscitation; AED, automated external defibrillator; EMS, emergency medical service; impact phase, 0-23 weeks from March 11; postimpact phase, from 24 weeks after March 11 until March 11 of the following year; OR, odds ratio; CI, confidence interval.  
a) 2010/2012 as a reference



- b) Asphyxia, submersion, hypothermia, poisoning, and trauma
- c) Time interval between emergency call and EMS arrival at patient

For peer review only

1  
2  
3  
4  
5  
6  
7  
8  
9  
10  
11  
12  
13  
14  
15  
16  
17  
18  
19  
20  
21  
22  
23  
24  
25  
26  
27  
28  
29  
30  
31  
32  
33  
34  
35  
36  
37  
38  
39  
40  
41  
42  
43  
44  
45  
46

1  
2  
3 *Multivariable regression analyses of the differences in BCPR provision and outcomes*  
4  
5 *between the disaster year and the predisaster/postdisaster years*  
6

7 In the tsunami-affected prefectures, the rates of BCPR, 1-month survival and 1-month  
8 neurologically favorable outcome in 2011 were significantly lower than those in 2010/2012  
9 during the impact phase. During the postimpact phase, no significant difference in any of  
10 these parameters was observed between 2011 and 2010/2012. (Table 2). In other prefectures,  
11 significant differences were observed neither during the impact phase nor during the  
12 postimpact phase (Supplemental Table 2).  
13  
14  
15  
16  
17  
18  
19  
20

21 As shown in the footnotes, the multivariable regression analysis disclosed that DA-  
22 CPR (with adjusted ORs ranging from 7.07 to 9.27) was a common and major factor  
23 associated with BCPR provision, regardless of the phase and prefecture. The major factors  
24 associated with a neurologically favorable outcome included shockable initial rhythm and  
25 EMS response time. Notably, the adjusted OR (95% confidence interval [CI]) of shockable  
26 initial rhythms for neurologically favorable outcome was much higher during the impact  
27 phase than during the postimpact phase in tsunami-affected prefectures (12.4 [7.3–20.9] vs.  
28 7.1 [4.7–10.8], interaction test,  $P < 0.01$ ).  
29  
30  
31  
32  
33  
34  
35  
36  
37  
38  
39  
40  
41  
42  
43  
44  
45  
46  
47  
48  
49  
50  
51  
52  
53  
54  
55  
56  
57  
58  
59  
60

**Table 2** Phasic comparisons of bystander cardiopulmonary resuscitation and outcomes between 2011 and 2010/2012 in tsunami-affected prefectures

| BCPR and outcomes                         | Impact phase      |                          | Adjusted OR<br>(95% CI) with<br>2010/2012 as a<br>reference | Postimpact phase    |                          | Adjusted OR<br>(95% CI) with<br>2010/2012 as a<br>reference |
|-------------------------------------------|-------------------|--------------------------|-------------------------------------------------------------|---------------------|--------------------------|-------------------------------------------------------------|
|                                           | 2011<br>(N = 882) | 2010/2012<br>(N = 1,565) |                                                             | 2011<br>(N = 1,179) | 2010/2012<br>(N = 2,454) |                                                             |
| BCPR rate, No. (%)                        | 375 (42.5)        | 754 (48.2)               | <b>0.82 (0.68–0.99)<sup>a)</sup></b>                        | 510 (43.3)          | 1,068 (43.5)             | 0.99 (0.84–1.16) <sup>d)</sup>                              |
| 1-month survival, No. (%)                 | 75 (8.5)          | 168 (10.7)               | <b>0.72 (0.52–0.99)<sup>b)</sup></b>                        | 103 (8.7)           | 200 (8.2)                | 1.02 (0.78–1.33) <sup>e)</sup>                              |
| Neurologically favorable outcome, No. (%) | 35 (4.0)          | 82 (5.2)                 | <b>0.62 (0.38–0.98)<sup>c)</sup></b>                        | 48 (4.1)            | 107 (4.4)                | 0.89 (0.61–1.29) <sup>f)</sup>                              |

BCPR, bystander cardiopulmonary resuscitation; impact phase, 0–23 weeks from March 11; postimpact phase, from 24 weeks after March 11 until March 11 of the following year; OR, odds ratio; CI, confidence interval.

a) Among the other factors including in the logistic regression model, age (Adjusted OR; 95% CI, 0.93; 0.88–0.99/10 years), family bystander (0.52; 0.38–0.71), and DA-CPR provision (7.07; 5.89–8.5) were significantly associated with BCPR rate.

b) Among the other factors including in the logistic regression model, age (0.81; 0.75–0.88/10 years), EMS response time (0.38; 0.31–0.48/10 min), time interval of witness-to-emergency call (0.71; 0.59–0.91/10 min), male patients (1.43; 1.01–2.03), daytime (7:00 a.m.–7:00 p.m.) OHCA (1.54; 1.13–2.11), shockable initial rhythm (6.93; 4.92–9.76), and epinephrine administration (0.64; 0.41–0.99) were significantly associated with 1-month survival.

c) Among the other factors including in the logistic regression model, age (0.76; 0.69–0.85/10 years), EMS response time (0.29; 0.23–0.39/10 min), time interval of witness-to-emergency call (0.54; 0.41–0.79/10 min), shockable initial rhythm (12.4; 7.34–20.9), and epinephrine administration (0.18; 0.07–0.44) were significantly associated with neurologically favorable outcome.

d) Among the other factors including in the logistic regression model, age (0.92; 0.87–0.97/10 years), family bystander (0.49; 0.37–0.64), and DA-CPR provision (9.27; 7.92–10.9) were significantly associated with BCPR rate.

1  
2  
3 e) Among the other factors including in the logistic regression model, age (0.86; 0.80–0.92/10 years), EMS response time (0.46; 0.39–0.56/10 min), time  
4 interval of witness-to-emergency call (0.66; 0.57–0.80/10 min), cardiac etiology (0.67; 0.50–0.89), and shockable initial rhythm (6.93; 4.92–9.76) were  
5 significantly associated with 1-month survival.  
6  
7

8  
9 f) Among the other factors including in the logistic regression model, age (0.87; 0.79–0.97/10 years), EMS response time (0.39; 0.31–0.51/10 min), time  
10 interval of witness-to-emergency call (0.53; 0.43–0.69/10 min), shockable initial rhythm (12.4; 7.34–20.9), and cardiac etiology (1.53; 1.07–2.2) were  
11 significantly associated with neurologically favorable outcome.  
12  
13  
14  
15  
16  
17  
18  
19  
20  
21  
22  
23  
24  
25  
26  
27  
28  
29  
30  
31  
32  
33  
34  
35  
36  
37  
38  
39  
40  
41  
42  
43  
44  
45  
46

**Supplemental Table 2** Phasic comparisons of bystander cardiopulmonary resuscitation and outcomes between 2011 and 2010/2012 in non-affected prefectures

| BCPR and outcomes                         | Impact phase        |                           | Adjusted OR<br>(95% CI) with<br>2010/2012 as a<br>reference | Postimpact phase     |                           | Adjusted OR<br>(95% CI) with<br>2010/2012 as a<br>reference |
|-------------------------------------------|---------------------|---------------------------|-------------------------------------------------------------|----------------------|---------------------------|-------------------------------------------------------------|
|                                           | 2011<br>(N = 9,696) | 2010/2012<br>(N = 17,985) |                                                             | 2011<br>(N = 14,024) | 2010/2012<br>(N = 26,899) |                                                             |
| BCPR rate, No. (%)                        | 3,907 (40.3)        | 7,263 (40.4)              | 0.96 (0.91–1.02) <sup>a)</sup>                              | 5,801 (41.4)         | 11,059 (41.1)             | 1.01 (0.96–1.05) <sup>b)</sup>                              |
| 1-month survival, No. (%)                 | 805 (8.3)           | 1,509 (8.4)               | 1.00 (0.91–1.10)                                            | 1,146 (8.2)          | 2,120 (7.9)               | 1.02 (0.94–1.10)                                            |
| Neurologically favorable outcome, No. (%) | 413 (4.3)           | 735 (4.1)                 | 1.07 (0.93–1.22) <sup>b)</sup>                              | 557 (4.0)            | 1,056 (3.9)               | 1.01 (0.90–1.13)                                            |

BCPR, bystander cardiopulmonary resuscitation; impact phase, 0-23 weeks from March 11;

postimpact phase, from 24 weeks after March 11 until March 11 of the following year; OR, odds ratio; CI, confidence interval.

a) Among the other factors including in the logistic regression model, age (adjusted OR; 95% CI, 0.94; 0.92–0.95/10 years), family bystander (0.50; 0.45–0.55), cardiac etiology (1.1; 1.03–1.17), and DA-CPR provision (8.60; 8.12–9.11) were significantly associated with BCPR rate.

b) Among the other factors including in the logistic regression model, age (0.93; 0.92–0.95/10 years), family bystander (0.50; 0.46–0.55), cardiac etiology (1.1; 1.04–1.15), and DA-CPR provision (8.99; 8.57–9.42) were significantly associated with BCPR rate.

1  
2  
3 *Analysis of indices for dispatcher-assisted and bystander-initiated resuscitation efforts*

4  
5 In tsunami-affected prefectures, DA-CPR sensitivity and bystander's compliance to DA-CPR  
6  
7 appeared to be suppressed during the impact phase in 2011, being 55.8% and 62.1%,  
8  
9 respectively in 2011, and 60.0% and 69.5%, respectively in 2010/2012. However, the  
10  
11 difference between 2011 and 2010/2012 was significant only for bystander's compliance to  
12  
13 DA-CPR (Adjusted OR; 95% CI, 0.72; 0.57–0.92). During the postimpact phase, there were  
14  
15 no significant differences in these indices between 2011 and 2010/2012. Difference in the  
16  
17 performance of BCPR was detected neither during the impact phase nor during the  
18  
19 postimpact phase (Table 3).  
20  
21  
22

23 In other prefectures, none of the three indices differed between 2011 and 2010/2012;  
24  
25 neither during the impact phase nor during the postimpact phase (Supplemental Table 3).  
26  
27  
28  
29  
30  
31  
32  
33  
34  
35  
36  
37  
38  
39  
40  
41  
42  
43  
44  
45  
46  
47  
48  
49  
50  
51  
52  
53  
54  
55  
56  
57  
58  
59  
60

**Table 3** Phasic comparisons of indices for dispatcher-assisted and bystander-initiated resuscitation efforts between 2011 and 2010/2012 in tsunami-affected prefectures

| Indices related to DA-CPR and BCPR                 | Impact phase          |                       | Unadjusted OR (95% CI) with 2010/2012 as a reference | Postimpact phase |                    | Unadjusted OR (95% CI) with 2010/2012 as a reference |
|----------------------------------------------------|-----------------------|-----------------------|------------------------------------------------------|------------------|--------------------|------------------------------------------------------|
|                                                    | 2011                  | 2010/2012             |                                                      | 2011             | 2010/2012          |                                                      |
| DA-CPR sensitivity, No./total (%)                  | 433/776 (55.8)        | 835/1,391 (60.0)      | 0.84 (0.70–1.00)                                     | 598/1,062 (56.3) | 1,240/2,224 (55.8) | 1.02 (0.88–1.19)                                     |
| Bystander’s compliance to DA-CPR, No./total (%)    | <b>269/433 (62.1)</b> | <b>255/835 (69.5)</b> | <b>0.72 (0.57–0.92)</b>                              | 393/598 (65.7)   | 838/1,240 (67.6)   | 0.92 (0.75–1.13)                                     |
| Bystander’s own performance of BCPR, No./total (%) | 106/449 (23.6)        | 174/730 (23.8)        | 0.99 (0.72–1.07)                                     | 117/581 (20.1)   | 230/1,214 (19.0)   | 1.08 (0.84–1.39)                                     |

DA-CPR, dispatcher-assisted cardiopulmonary resuscitation; BCPR, bystander cardiopulmonary resuscitation; impact phase, 0-23 weeks from March 11; postimpact phase, from 24 weeks after March 11 until March 11 of the following year; OR, odds ratio; CI, confidence interval.

**Supplemental Table 3** Phasic comparisons of indices for dispatcher-assisted and bystander-initiated resuscitation efforts between 2011 and 2010/2012 in non-affected prefectures

| Indices related to DA-CPR and BCPR                 | Impact phase       |                     | Unadjusted OR (95% CI) with 2010/2012 as a reference | Postimpact phase    |                      | Unadjusted OR (95% CI) with 2010/2012 as a reference |
|----------------------------------------------------|--------------------|---------------------|------------------------------------------------------|---------------------|----------------------|------------------------------------------------------|
|                                                    | 2011               | 2010/2012           |                                                      | 2011                | 2010/2012            |                                                      |
| DA-CPR sensitivity, No./total (%)                  | 4,882/8,834 (55.3) | 8,833/16,350 (54.0) | 1.05 (0.99–1.11)                                     | 7,139/12,788 (55.8) | 13,640/24,565 (55.5) | 1.05 (0.99–1.11)                                     |
| Bystander's compliance to DA-CPR, No./total (%)    | 3,041/4,882 (62.3) | 5,628/8,833 (63.7)  | 0.94 (0.88–1.01)                                     | 8,725/13,640 (63.9) | 8,725/13,640 (64.0)  | 1.00 (0.94–1.06)                                     |
| Bystander's own performance of BCPR, No./total (%) | 862/4,814 (17.9)   | 1,635/9,152 (17.9)  | 1.00 (0.92–1.10)                                     | 1,236/6,885 (18.0)  | 2,334/13,259 (17.6)  | 1.02 (0.95–1.11)                                     |

DA-CPR, dispatcher-assisted cardiopulmonary resuscitation; BCPR, bystander cardiopulmonary resuscitation; impact phase, 0–23 weeks from March 11; postimpact phase, from 24 weeks after March 11 until March 11 of the following year; OR, odds ratio; CI, confidence interval.



## Discussion

In disaster mental health, the reactions of the community and the individual are usually divided to four phases (heroic phase, honeymoon phase, disillusionment phase, and restoration phase),<sup>17</sup> although the duration of these phases may vary depending on the scale and type of disaster. The impact phase in this study covers the period from heroic phase to disillusionment phase. This relatively long impact phase and the wide area affected by the disaster may contribute to the detection of a significant impact of the disaster in this study.

Loss of family members and friends, lack of employment stability, or extensive damage to property, resulting in loss of or a decrease in income are reported as risk factors for the development of disaster-related mental health problems.<sup>18-20</sup> In this study, the BCPR rate in tsunami-affected prefectures temporally increased during the 8–11 weeks after the disaster but remained low thereafter, reflecting a temporal relief in anxiety due to increased provision of supplies and accommodation during the “honeymoon phase” and recognition of depressed economic resilience, repeated aftershocks, and escape or avoidance behavior<sup>21</sup> during disillusionment phase.

The BCPR rate varies between countries, but the BCPR rate in Japan in the 3 years from 2010 to 2012 was as high as or higher than that in the European Union and United States.<sup>22,23</sup> In comparison with other prefectures, a higher BCPR rate in tsunami-affected prefectures might be due to the higher proportion of citizens having attended BLS training courses every year.<sup>24-26</sup> People with CPR training are known to perform BCPR more than those without an experience of CPR training.<sup>27</sup> Compared with the patients with OHCA in the other (nonaffected) prefectures, those in the tsunami-affected prefectures were subject to relatively higher BCPR rates in the predisaster and postdisaster years, particularly during the spring and summer seasons, which is identical to that in the impact phase that we determined. Major industries in the affected areas included fishery, agriculture, and food processing managed by corporative unions. The population, particularly the elderly, typically endures a

1  
2  
3 rugged winter at home, and their social activities diminish at the end of autumn and over the  
4  
5 winter. Meanwhile, during spring and summer, citizens including the elderly cooperate in  
6  
7 agricultural work and preparation of social events, including festivals and outdoor events.<sup>28</sup>  
8  
9 Increased collaborative activities of citizens, including the elderly, in these seasons and  
10  
11 accommodativeness as a general personality trait of the citizens might be one of the reasons  
12  
13 for this seasonal variation in BCPR rate because OHCA cases in these seasons are frequently  
14  
15 managed by many bystanders, including those with training experience.  
16  
17

18  
19 Surveys on citizens and EMS personnel who survived the disaster in tsunami-affected  
20  
21 prefectures reported that more than half of them lost their family and friends/colleagues.<sup>29</sup>  
22  
23 People who died during the disaster were mostly the elderly (54.4%), suggesting that the  
24  
25 proportion of trained bystanders was not affected by the disaster.<sup>30</sup> Thus, decreased rates of  
26  
27 BCPR and DA-CPR may be attributed to the decreased collaborative social activities and  
28  
29 psychological reactions of dispatchers and bystanders, which may interfere with  
30  
31 communication between bystanders and dispatchers.  
32  
33

34  
35 The 2011 earthquake and the earthquake-associated tsunami were followed by a  
36  
37 nuclear accident in the Fukushima prefecture. People who had a false understanding of  
38  
39 radiation were afraid to interact with evacuees and avoided contact. For these reasons, it is  
40  
41 highly possible that nuclear pollution may interfere with bystander-initiated CPR provision  
42  
43 due to augmented fear of nuclear pollution during CPR, particularly of refugees from the  
44  
45 polluted area.<sup>31</sup> Recent studies on the COVID-19 pandemic on BCPR support this  
46  
47 assumption.<sup>12</sup>  
48  
49

50  
51 It might be difficult to prevent the BCPR and certain outcomes from deteriorating  
52  
53 during the impact phase. The analysis of the three indices related to DA-CPR and BCPR  
54  
55 showed that only the level of voluntary performance of BCPR was preserved during the  
56  
57 impact phase in tsunami-affected prefectures. Because BLS training is known to augment the  
58  
59 willingness to provide voluntary BCPR without DA-CPR<sup>32</sup>, systematic BLS training to  
60

1  
2  
3 citizens may be effective for preservation of voluntary performance of BCPR in the event of  
4  
5 a disaster. Furthermore, this study showed that the dependence of outcome on initial  
6  
7 shockable rhythm was augmented during the impact phase in Tsunami-affected prefecture.  
8  
9 However, incidences of public access to defibrillation (defibrillation by bystanders with an  
10  
11 AED) during the study period was extremely low (<1%), particularly during the impact phase  
12  
13 in Tsunami-affected prefecture (0.6%). Public-Access Defibrillation has definitive impact on  
14  
15 the outcome of OHCA<sup>33</sup>. Therefore, BLS training including AED use and its supply might  
16  
17 function as preparedness for disaster.  
18  
19  
20  
21  
22

### 23 **Limitation**

24  
25 The present study has several strengths. Firstly, this study focused on alterations in  
26  
27 bystander-initiated and dispatcher-instructed BCPR after a large-scale disaster. Secondly, not  
28  
29 only before-after comparisons but also differences in trends were analyzed between tsunami-  
30  
31 affected and -unaffected prefectures using a large nationwide dataset. However, this study  
32  
33 also has several limitations. First, although the catastrophe occurred in the coastal areas of  
34  
35 some of the prefectures, the analyses were performed after dividing the prefectures. In  
36  
37 tsunami-affected prefectures, no major urban areas were located in the coastal area, and  
38  
39 differences in BCPR intervention between urban and rural areas<sup>34</sup> were excluded in this  
40  
41 study. Second, bystander-specific data, such as age, sex, and training experience were not  
42  
43 included in the database and therefore not available for study. Third, it was not possible to  
44  
45 study whether the bystanders were actually psychologically affected. Therefore, these factors  
46  
47 potentially associated with BCPR quality might affect the quality of the study results.<sup>35</sup>  
48  
49 Fourth, no comparative analysis was performed with the results of other disasters. Fifth, since  
50  
51 this study is based on one disaster that occurred in Japan, it is unclear whether the results will  
52  
53 apply to other disasters as well. Sixth, as with other observational studies, the validity of data  
54  
55 is another potential limitation.  
56  
57  
58  
59  
60

## Conclusions

A large-scale disaster may influence bystander-initiated CPR and outcomes of OHCA witnessed by family/friends/colleagues. BLS training might serve as preparedness for disaster and major accidents.

## Acknowledgments

We thank the EMS personnel and FDMA in Japan for their cooperation in collecting and managing the All-Japan Utstein Registry data. TU and KT equally contributed to this article as first authors.

## Article information

**Corresponding Author:** Tomoyuki Ushimoto, MD, PhD, Department of Emergency Medicine, Kanazawa Medical University, 1-1 Daigaku, Uchinada-machi, Kahoku-gun, Ishikawa 920-0293, Japan

**Contributions:** The corresponding author attests that all listed authors meet authorship criteria and that no others meeting the criteria have been omitted.

TU and KT had full access to all the data in the study and take responsibility for the integrity of the data and the accuracy of the data analysis. TU and KT equally contributed to this article as first authors.

Study concept and design: TU, KT and HI.

Acquisition, analysis, and interpretation of data: All authors.

Drafting of the manuscript: AY, HM, HI, KT and TU.

Clinical revision of the manuscript for important intellectual content: TU, HI, KT and YW.

Statistical analysis: TU, KT, and HI.

Obtained funding: None.

Administrative, technical, or material support: HI and YW.

Study supervision: HI and YW.

**Copyright:** The corresponding author has the right to grant on behalf of all authors and does grant on behalf of all authors, a worldwide licence to the Publishers and its licensees in perpetuity, in all forms, formats and media (whether known now or created in the future), to i) publish, reproduce, distribute, display, and store the Contribution, ii) translate the Contribution into other languages, create adaptations, reprints, include within collections and create summaries, extracts and/or, abstracts of the Contribution, iii) create any other derivative work(s) based on the Contribution, iv) to exploit all subsidiary rights in the

1  
2  
3 Contribution, v) the inclusion of electronic links from the Contribution to third party material  
4  
5 wherever it may be located; and, vi) licence any third party to do any or all of the above.  
6  
7  
8

9  
10 **Competing Interest statement:** All authors have completed the ICMJE uniform disclosure  
11 form at [www.icmje.org/coi\\_disclosure.pdf](http://www.icmje.org/coi_disclosure.pdf) and declare: no support from any organization for  
12 the submitted work; no financial relationships with any organizations that might have an  
13  
14 interest in the submitted work in the previous three years; no other relationships or activities  
15  
16 that could appear to have influenced the submitted work.  
17  
18  
19

20  
21  
22  
23 **Ethical approval:** This study was approved by the institutional review board of the Ishikawa  
24 Medical Control Council and conducted by the study group comprising of members of the  
25  
26 Ishikawa Medical Control Council and their collaborators. Patient consent was not required  
27  
28 for use of the secondary data.  
29  
30  
31

32  
33  
34  
35 **Transparency:** TU affirmed that the manuscript is an honest, accurate, and transparent  
36 account of the study.  
37  
38  
39

40  
41  
42 **Funding:** None.  
43  
44

45  
46 **Data sharing:** No additional data available.  
47  
48

49  
50  
51 **Additional information:** Some references used in this article are available online and cited  
52 as embedded hyperlinks.  
53  
54  
55  
56  
57  
58  
59  
60

## References

1. Department of International Affairs, Japan Science and Technology Agency. The Great East Japan Earthquake Information from Official Websites, 2011 (Accessed 8 December 2021, at [https://www.jst.go.jp/pr/pdf/great\\_east\\_japan\\_earthquake.pdf](https://www.jst.go.jp/pr/pdf/great_east_japan_earthquake.pdf)).
2. Fire and Disaster Management Agency (Japan). Great East Japan Earthquake (in Japanese) (Accessed 8 December 2021, at <https://www.fdma.go.jp/disaster/higashinihon/>).
3. Japan Meteorological Agency. The 2011 Great East Japan Earthquake: Number of aftershock (in Japanese) (Accessed 8 December 2021, at [http://www.data.jma.go.jp/svd/eqev/data/2011\\_03\\_11\\_tohoku/aftershock/](http://www.data.jma.go.jp/svd/eqev/data/2011_03_11_tohoku/aftershock/)).
4. Reconstruction Agency (Japan). Recovery and Reconstruction from the Great East Japan Earthquake, 2012 (in Japanese) (Accessed 8 December 2021, at [https://www.reconstruction.go.jp/topics/20130104\\_higashinippondaishinsai\\_fukkoh.pdf](https://www.reconstruction.go.jp/topics/20130104_higashinippondaishinsai_fukkoh.pdf)).
5. Ozdemir O, Boysan M, Guzel Ozdemir P, Yilmaz E. Relationships between posttraumatic stress disorder (PTSD), dissociation, quality of life, hopelessness, and suicidal ideation among earthquake survivors. *Psychiatry Res* 2015; 228: 598-605. doi: 10.1016/j.psychres.2015.05.045.
6. Makwana N. Disaster and its impact on mental health: A narrative review. *J Family Med Prim Care* 2019; 8: 3090-3095. doi: 10.4103/jfmpe.jfmpe\_893\_19.
7. Leor J, Poole WK, Kloner RA. Sudden cardiac death triggered by an earthquake. *N Engl J Med* 1996; 34: 413-419.
8. Ogawa K, Tsuji I, Shiono K, Hisamichi S. Increased acute myocardial infarction mortality following the 1995 Great Hanshin-Awaji earthquake in Japan. *Int J Epidemiol* 2002; 29: 449-455.
9. Sokejima S, Nakatani Y, Kario K, Kayaba K, Minowa M, Kagamimori S. Seismic intensity and risk of cerebrovascular stroke: 1995 Hanshin-Awaji earthquake. *Prehosp Disaster Med* 2004; 19: 297-306.
10. Yamashita A, Maeda T, Myojo Y, Wato Y, Ohta K, Inaba H. Temporal variations in dispatcher-assisted and bystander-initiated resuscitation efforts. *Am J Emerg Med* 2018; 36: 2203-2210. doi: 10.1016/j.ajem.2018.03.080.
11. Savastano S, Vanni V. Cardiopulmonary resuscitation in real life: The most frequent fears of lay rescuers. *Resuscitation* 2011; 82: 568-571. doi:10.1016/j.resuscitation.2010.10.010
12. Pranata R, Lim MA, Yonas E, Siswanto BB, Meyer M. Out-of-hospital cardiac arrest prognosis during the COVID-19 pandemic. *Intern Emerg Med* 2020; (0123456789): 7-9. doi:10.1007/s11739-020-02428-7.

13. Jacobs I, Nadkarni V, Bahr J, et al. Cardiac arrest and cardiopulmonary resuscitation outcome reports: update and simplification of the Utstein templates for resuscitation registries: a statement for healthcare professionals from a task force of the International Liaison Committee on resuscitation. *Circulation* 2004; 110: 3385–97.
14. Jennett B, Bond M. Assessment of outcome after severe brain damage. *Lancet* 1976; 1: 480–4. doi:10.1016/S0140-6736(75)92830-5.
15. Maeda T, Yamashita A, Myojo Y, Wato Y, Inaba H. Augmented survival of out-of-hospital cardiac arrest victims with the use of mobile phones for emergency communication under the DA-CPR protocol getting information from callers beside the victim. *Resuscitation* 2016; 107: 80-87. doi:10.1016/j.resuscitation.2016.08.010
16. Nishi T, Kamikura T, Funada A, Myojo Y, Ishida T, Inaba H. Are regional variations in activity of dispatcher-assisted cardiopulmonary resuscitation associated with out of-hospital cardiac arrests outcomes? A nation-wide population-based cohort study. *Resuscitation* 2016; 98: 27–34. doi: 10.1016/j.resuscitation.2015.10.004.
17. Math SB, Nirmala MC, Moirangthem S, Kumar NC. Disaster Management: Mental Health Perspective. *Indian J Psychol Med* 2015; 37: 261-71. doi: 10.4103/0253-7176.162915.
18. Norris FH, Friedman MJ, Watson PJ, Byrne CM, Diaz E, Kaniasty K. 60,000 disaster victims speak: Part I. An empirical review of the empirical literature, 1981-2001. *Psychiatry* 2002; 65: 207-39.
19. Başoğlu M, Kiliç C, Salcioğlu E, Livanou M. Prevalence of posttraumatic stress disorder and comorbid depression in earthquake survivors in Turkey: an epidemiological study. *J Trauma Stress* 2004; 17: 133-41.
20. van Griensven F, Chakkraband ML, Thienkrua W, et al. Mental health problems among adults in tsunami-affected areas in southern Thailand. *JAMA* 2006; 296: 537-48.
21. Avoidance behavior. (n.d.) Miller-Keane Encyclopedia and Dictionary of Medicine, Nursing, and Allied Health, Seventh Edition. (2003). (Retrieved 8 December 2021 from <https://medical-dictionary.thefreedictionary.com/Avoidance+behavior>).
22. Jan-Thorsten G, Rolf L, Rudolph WK, et al. Corrigendum to "EuReCa ONE-27 Nations, ONE Europe, ONE Registry A prospective one month analysis of out-of-hospital cardiac arrest outcomes in 27 countries in Europe". *Resuscitation* 2016; 105: 188-195.
23. Gabriel R, Mattias R, Martin J, et al. Survival in Out-of-Hospital Cardiac Arrest After Standard Cardiopulmonary Resuscitation or Chest Compressions Only Before Arrival of Emergency Medical Services: Nationwide Study During Three Guideline Periods. *Circulation* 2019; 139: 2600–2609.
24. Fire and Disaster Management Agency (Japan). Rescue operations and first-aid, 2010 (in



- 1  
2  
3 Japanese) (Accessed 8 December 2021, at  
4 [https://www.fdma.go.jp/pressrelease/houdou/items/h23/2312/231216\\_1houdou/02\\_1.pdf](https://www.fdma.go.jp/pressrelease/houdou/items/h23/2312/231216_1houdou/02_1.pdf)).
- 5  
6 25. Fire and Disaster Management Agency (Japan). Rescue operations and first-aid, 2011 (in  
7 Japanese) (Accessed 8 December 2021, at  
8 [https://www.fdma.go.jp/publication/rescue/items/kkkg\\_h24\\_01\\_kyukyu.pdf](https://www.fdma.go.jp/publication/rescue/items/kkkg_h24_01_kyukyu.pdf)).
- 9  
10 26. Fire and Disaster Management Agency (Japan). Rescue operations and first-aid, 2012 (in  
11 Japanese) (Accessed 8 December 2021, at  
12 [https://www.fdma.go.jp/publication/rescue/items/kkkg\\_h25\\_01\\_kyukyu.pdf](https://www.fdma.go.jp/publication/rescue/items/kkkg_h25_01_kyukyu.pdf))
- 13  
14 27. Robert G, Andrew S L, Patricia C, et al. European Resuscitation Council Guidelines for  
15 Resuscitation 2015: Section 10. Education and implementation of resuscitation. *Resuscitation*  
16 2015; 95: 288-301.
- 17  
18 28. Portal Site of Official Statistics of Japan website. 2010 Population Census (Accessed 8  
19 December 2021, at <http://www.stat.go.jp/english/data/kokusei/2010/summary.html>).
- 20  
21 29. Fire and Disaster Management Agency (Japan). Report, 2013 (in Japanese) (Accessed 8  
22 December 2020, at [https://www.fdma.go.jp/singi\\_kento/kento/kento098.html](https://www.fdma.go.jp/singi_kento/kento/kento098.html)).
- 23  
24 30. Ministry of Health, Labor and Welfare (Japan). Overview of 2011 vital statistics, death  
25 situation due to the Great East Japan Earthquake from the viewpoint of vital statistics. (in  
26 Japanese) (Accessed 8 December 2021, at  
27 [https://www.mhlw.go.jp/toukei/saikin/hw/jinkou/kakutei11/dl/14\\_x34.pdf](https://www.mhlw.go.jp/toukei/saikin/hw/jinkou/kakutei11/dl/14_x34.pdf)).
- 28  
29 31. Maeda M, Oe M. Mental Health Consequences and Social Issues After the Fukushima  
30 Disaster. *Asia Pac J Public Health* 2017; 29: 36-46. doi:10.1177/1010539516689695.
- 31  
32 32. Tanigawa K, Iwami T, Nishiyama C, et al. Are trained individuals more likely to perform  
33 bystander CPR? An observational study. *Resuscitation* 2011; 82(5):523-8. doi:  
34 10.1016/j.resuscitation.2011.01.027. Epub 2011 Feb 26.
- 35  
36 33. Kitamura T, Kiyohara K, Sakai T, et al. Public-Access Defibrillation and Out-of-Hospital  
37 Cardiac Arrest in Japan. *N Engl J Med* 2016; 375:1649-1659. doi: 10.1056/NEJMsa1600011.
- 38  
39 34. Mathiesen W, Bjørshol C, Kvaløy J, Søreide E. Effects of modifiable prehospital factors  
40 on survival after out-of-hospital cardiac arrest in rural versus urban areas. *Crit Care* 2018; 22:  
41 99. doi:10.1186/s13054-018-2017-x.
- 42  
43 35. Takei Y, Nishi T, Matsubara H, Hashimoto M, Inaba H. Factors associated with quality  
44 of bystander CPR: the presence of multiple rescuers and bystander-initiated CPR without  
45 instruction. *Resuscitation* 2014; 85: 492-8. doi:10.1016/j.resuscitation.2013.12.019.
- 46  
47  
48  
49  
50  
51  
52  
53  
54  
55  
56  
57  
58  
59  
60

1  
2  
3 **Legends to figures**  
4

5 **Figure 1:** Data selection and subgroup extraction  
6

7 OHCA, out-of-hospital cardiac arrest; EMS, emergency medical service.  
8  
9

10  
11  
12 **Figure 2:** Four-week average trends of bystander cardiopulmonary resuscitation in tsunami-  
13 affected prefectures and other prefectures  
14

15 BCPR, bystander cardiopulmonary resuscitation; impact phase, 0-23 weeks from March 11.  
16  
17  
18

19  
20  
21 **Supplemental Figure:** Analysis of the disaster status and social responses  
22

23 Mw, Moment magnitude.  
24  
25  
26  
27  
28  
29  
30  
31  
32  
33  
34  
35  
36  
37  
38  
39  
40  
41  
42  
43  
44  
45  
46  
47  
48  
49  
50  
51  
52  
53  
54  
55  
56  
57  
58  
59  
60

1  
2  
3  
4  
5  
6  
7  
8  
9  
10  
11  
12  
13  
14  
15  
16  
17  
18  
19  
20  
21  
22  
23  
24  
25  
26  
27  
28  
29  
30  
31  
32  
33  
34  
35  
36  
37  
38  
39  
40  
41  
42  
43  
44  
45  
46  
47  
48  
49  
50  
51  
52  
53  
54  
55  
56  
57  
58  
59  
60

**All OHCA cases during the period of 2010.3.11–2013.3.10**  
N = 381,581

Unwitnessed cases N = 224,301  
EMS-witnessed cases N = 31,927  
Uncertain cases N = 524

**Bystander-witnessed cases**  
N = 124,829

Prehospital involvement of physicians N = 13,627

**Bystander-witnessed cases without any involvement of physicians**  
N = 111,202

Lack of information for analysis N = 2,891

**Bystander-witnessed cases for analysis**  
N = 108,311

Witnessed by others N = 33,627

**Family-, friend-, and colleague-witnessed cases for analysis**  
N = 74,684

**Disaster year 2011 (2011.3.11–2012.3.10)**  
N = 25,781

**Predisaster year and Postdisaster year**  
N = 48,903  
Predisaster year 2010 (2010.3.11–2011.3.10) N = 24,371  
Postdisaster year 2012 (2012.3.11–2013.3.10) N = 24,532

**tsunami-affected prefectures**  
N = 2,061

**Other prefectures**  
N = 23,720

**tsunami-affected prefectures**  
N = 4,019

**Other prefectures**  
N = 44,884

**Impact phase**  
N = 882

**Postimpact phase**  
N = 1,179

**Impact phase**  
N = 9,696

**Postimpact phase**  
N = 14,024

**Impact phase**  
N = 1,565

**Postimpact phase**  
N = 2,454

**Impact phase**  
N = 17,985

**Postimpact phase**  
N = 26,899

### A. Tsunami-affected prefectures (5 prefectures)

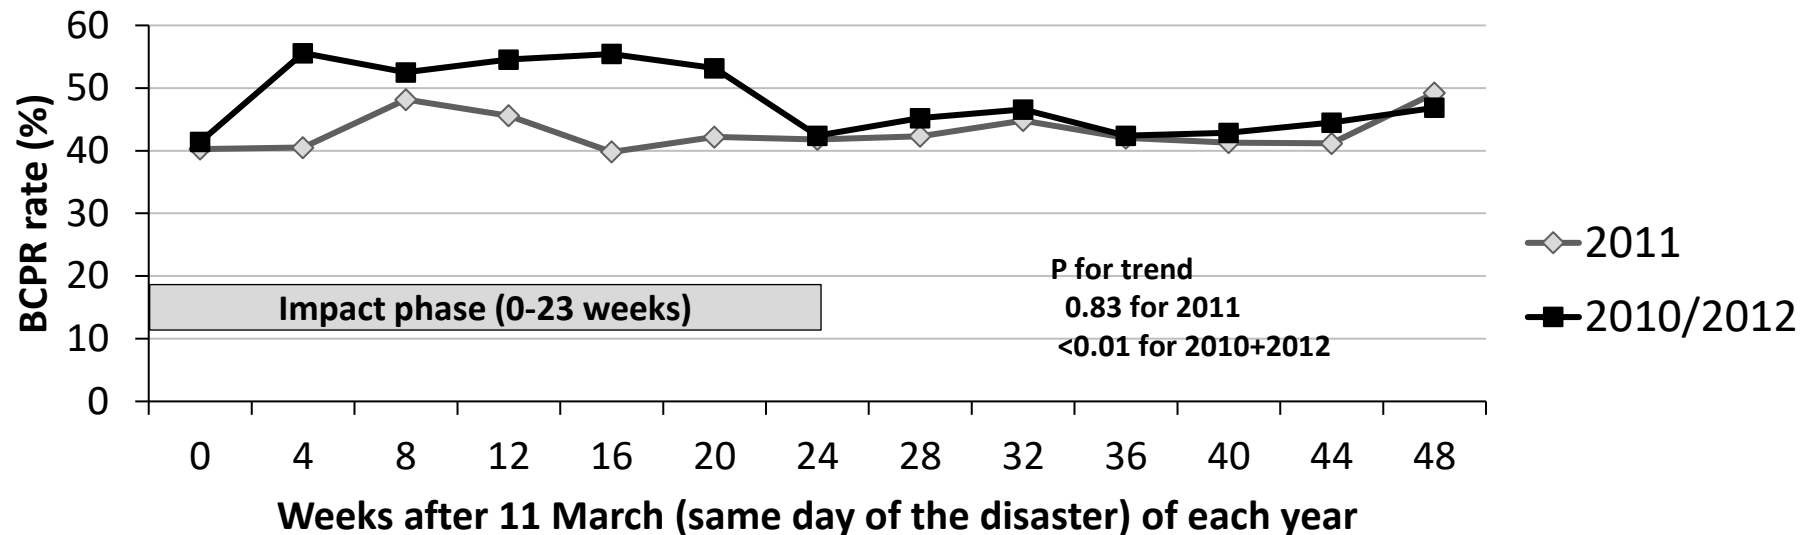

### B. Other prefectures (42 prefectures)

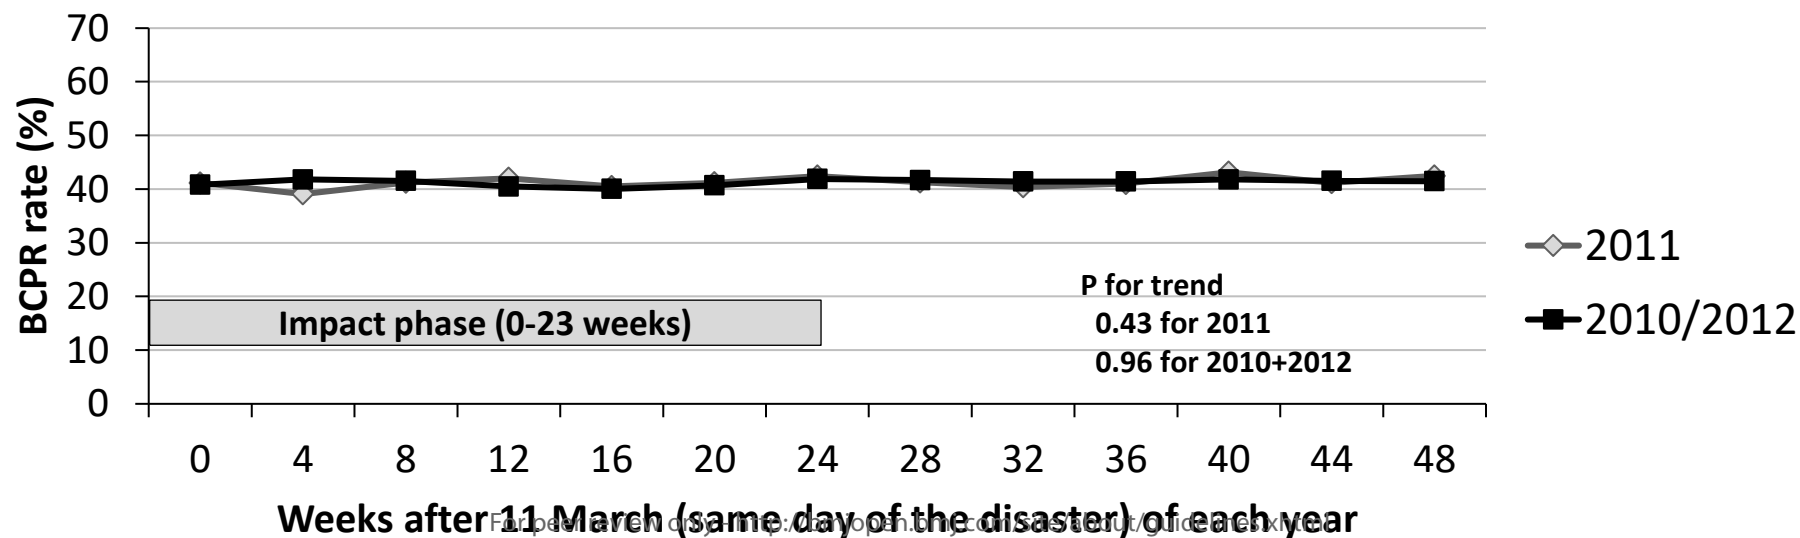

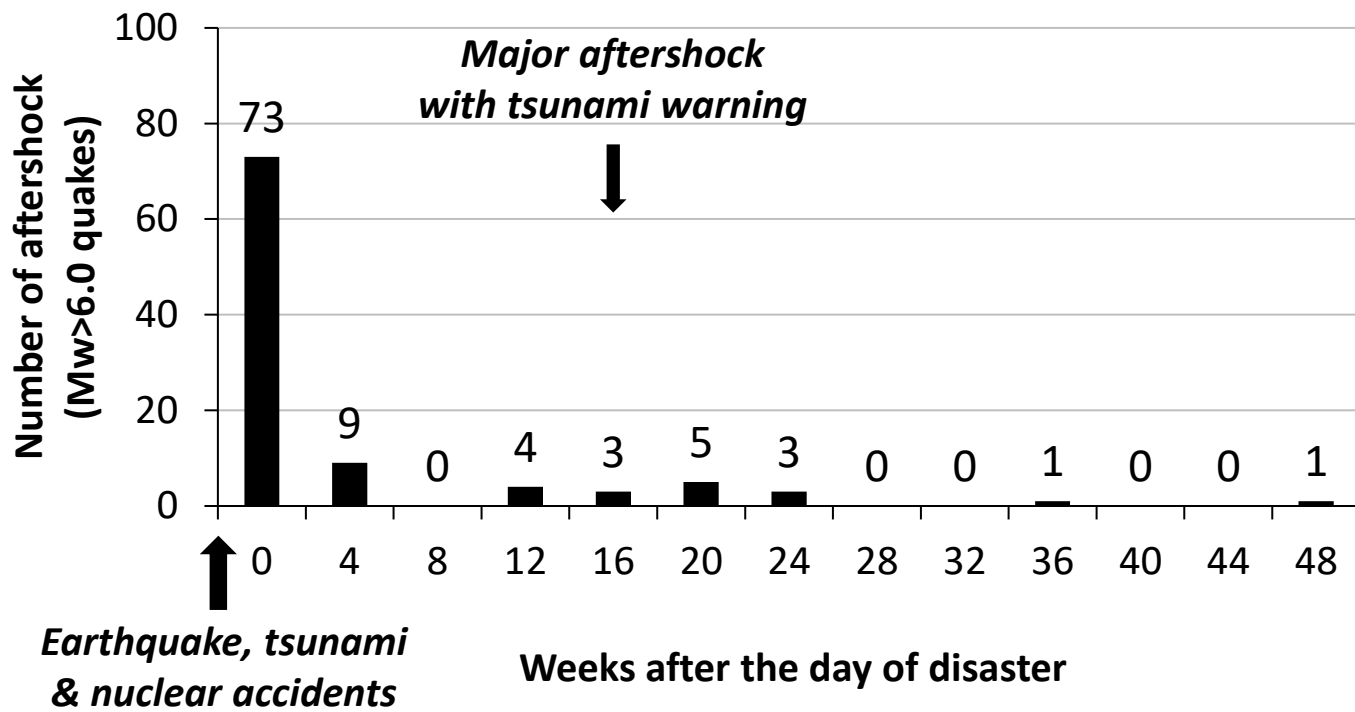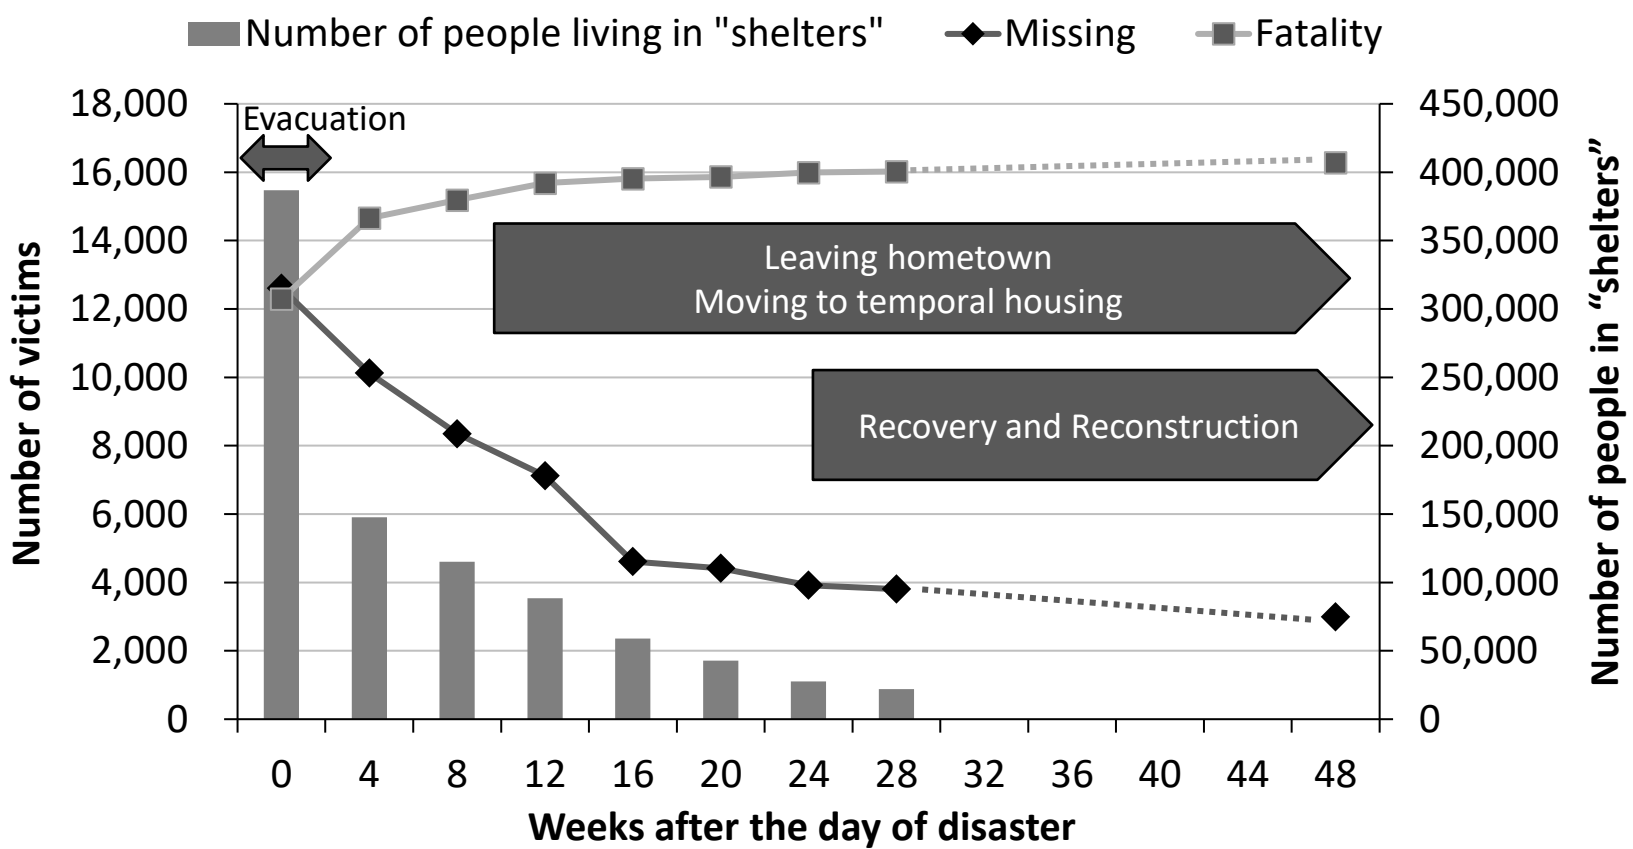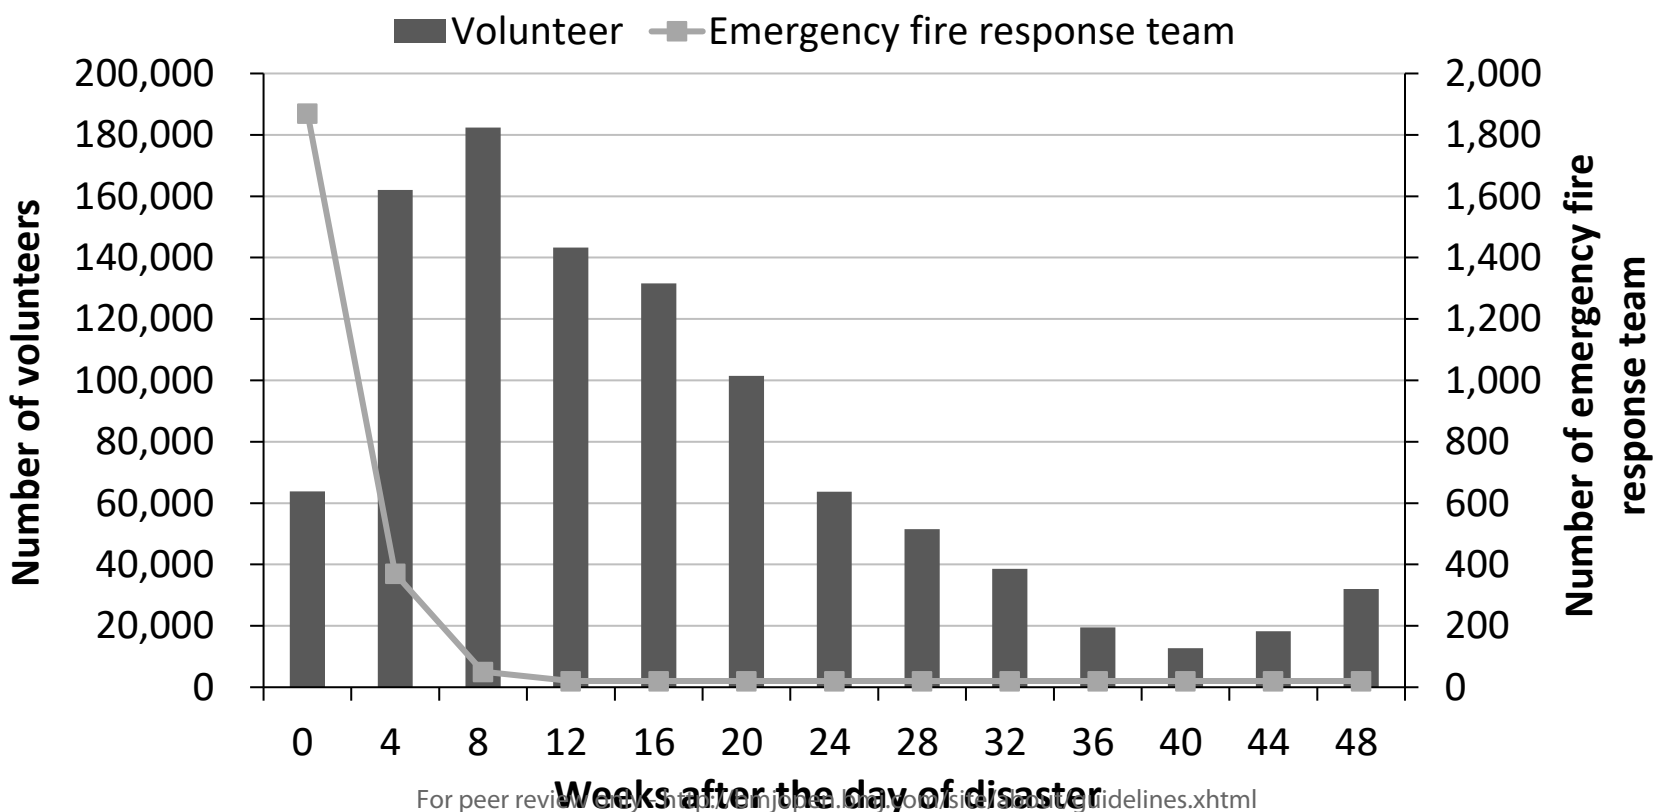

STROBE Statement—Checklist of items that should be included in reports of *cohort studies*

|                              | Item No | Recommendation                                                                                                                                                                                                                                            |   |
|------------------------------|---------|-----------------------------------------------------------------------------------------------------------------------------------------------------------------------------------------------------------------------------------------------------------|---|
| <b>Title and abstract</b>    | 1       | (a) Indicate the study's design with a commonly used term in the title or the abstract<br>Page numbers where the relevant information can be found : page 1                                                                                               | √ |
|                              |         | (b) Provide in the abstract an informative and balanced summary of what was done and what was found<br>Page numbers where the relevant information can be found : page 3                                                                                  | √ |
| <b>Introduction</b>          |         |                                                                                                                                                                                                                                                           |   |
| Background/rationale         | 2       | Explain the scientific background and rationale for the investigation being reported<br>Page numbers where the relevant information can be found : page 6                                                                                                 | √ |
| Objectives                   | 3       | State specific objectives, including any prespecified hypotheses<br>Page numbers where the relevant information can be found : page 7                                                                                                                     | √ |
| <b>Methods</b>               |         |                                                                                                                                                                                                                                                           |   |
| Study design                 | 4       | Present key elements of study design early in the paper<br>Page numbers where the relevant information can be found : page 7                                                                                                                              | √ |
| Setting                      | 5       | Describe the setting, locations, and relevant dates, including periods of recruitment, exposure, follow-up, and data collection<br>Page numbers where the relevant information can be found : page 7                                                      | √ |
| Participants                 | 6       | (a) Give the eligibility criteria, and the sources and methods of selection of participants. Describe methods of follow-up<br>Page numbers where the relevant information can be found : page 7                                                           | √ |
|                              |         | (b) For matched studies, give matching criteria and number of exposed and unexposed<br>Page numbers where the relevant information can be found : non                                                                                                     |   |
| Variables                    | 7       | Clearly define all outcomes, exposures, predictors, potential confounders, and effect modifiers. Give diagnostic criteria, if applicable<br>Page numbers where the relevant information can be found : page 8                                             | √ |
| Data sources/<br>measurement | 8*      | For each variable of interest, give sources of data and details of methods of assessment (measurement). Describe comparability of assessment methods if there is more than one group<br>Page numbers where the relevant information can be found : page 8 | √ |
| Bias                         | 9       | Describe any efforts to address potential sources of bias<br>Page numbers where the relevant information can be found : page 7                                                                                                                            | √ |
| Study size                   | 10      | Explain how the study size was arrived at<br>Page numbers where the relevant information can be found : page 7, Figure 1                                                                                                                                  | √ |
| Quantitative variables       | 11      | Explain how quantitative variables were handled in the analyses. If applicable, describe which groupings were chosen and why<br>Page numbers where the relevant information can be found : page 10                                                        | √ |
| Statistical methods          | 12      | (a) Describe all statistical methods, including those used to control for confounding<br>Page numbers where the relevant information can be found : page 8                                                                                                | √ |
|                              |         | (b) Describe any methods used to examine subgroups and interactions<br>Page numbers where the relevant information can be found : page 10                                                                                                                 | √ |
|                              |         | (c) Explain how missing data were addressed<br>Page numbers where the relevant information can be found : page 7                                                                                                                                          | √ |
|                              |         | (d) If applicable, explain how loss to follow-up was addressed<br>Page numbers where the relevant information can be found : non                                                                                                                          |   |
|                              |         | (e) Describe any sensitivity analyses<br>Page numbers where the relevant information can be found : page 9                                                                                                                                                | √ |

|    |                          |     |                                                                                           |   |
|----|--------------------------|-----|-------------------------------------------------------------------------------------------|---|
| 1  | <b>Results</b>           |     |                                                                                           |   |
| 2  | Participants             | 13* | (a) Report numbers of individuals at each stage of study—eg numbers potentially           | √ |
| 3  |                          |     | eligible, examined for eligibility, confirmed eligible, included in the study, completing |   |
| 4  |                          |     | follow-up, and analysed                                                                   |   |
| 5  |                          |     | Page numbers where the relevant information can be found : page 11, Figure 1              |   |
| 6  |                          |     | (b) Give reasons for non-participation at each stage                                      | √ |
| 7  |                          |     | Page numbers where the relevant information can be found : page 7, Figure 1               |   |
| 8  |                          |     | (c) Consider use of a flow diagram                                                        | √ |
| 9  |                          |     | Page numbers where the relevant information can be found : Figure 1                       |   |
| 10 | Descriptive data         | 14* | (a) Give characteristics of study participants (eg demographic, clinical, social) and     | √ |
| 11 |                          |     | information on exposures and potential confounders                                        |   |
| 12 |                          |     | Page numbers where the relevant information can be found : page 12                        |   |
| 13 |                          |     | (b) Indicate number of participants with missing data for each variable of interest       | √ |
| 14 |                          |     | Page numbers where the relevant information can be found : page 7                         |   |
| 15 |                          |     | (c) Summarise follow-up time (eg, average and total amount)                               | √ |
| 16 |                          |     | Page numbers where the relevant information can be found : page 7                         |   |
| 17 | Outcome data             | 15* | Report numbers of outcome events or summary measures over time                            | √ |
| 18 |                          |     | Page numbers where the relevant information can be found : page 11                        |   |
| 19 | Main results             | 16  | (a) Give unadjusted estimates and, if applicable, confounder-adjusted estimates and       | √ |
| 20 |                          |     | their precision (eg, 95% confidence interval). Make clear which confounders were          |   |
| 21 |                          |     | adjusted for and why they were included                                                   |   |
| 22 |                          |     | Page numbers where the relevant information can be found : page 13                        |   |
| 23 |                          |     | (b) Report category boundaries when continuous variables were categorized                 |   |
| 24 |                          |     | Page numbers where the relevant information can be found : non                            |   |
| 25 |                          |     | (c) If relevant, consider translating estimates of relative risk into absolute risk for a |   |
| 26 |                          |     | meaningful time period                                                                    |   |
| 27 |                          |     | Page numbers where the relevant information can be found : non                            |   |
| 28 | Other analyses           | 17  | Report other analyses done—eg analyses of subgroups and interactions, and sensitivity     | √ |
| 29 |                          |     | analyses                                                                                  |   |
| 30 |                          |     | Page numbers where the relevant information can be found : page 14                        |   |
| 31 | <b>Discussion</b>        |     |                                                                                           |   |
| 32 | Key results              | 18  | Summarise key results with reference to study objectives                                  | √ |
| 33 |                          |     | Page numbers where the relevant information can be found : page 18                        |   |
| 34 | Limitations              | 19  | Discuss limitations of the study, taking into account sources of potential bias or        | √ |
| 35 |                          |     | imprecision. Discuss both direction and magnitude of any potential bias                   |   |
| 36 |                          |     | Page numbers where the relevant information can be found : page 17                        |   |
| 37 | Interpretation           | 20  | Give a cautious overall interpretation of results considering objectives, limitations,    | √ |
| 38 |                          |     | multiplicity of analyses, results from similar studies, and other relevant evidence       |   |
| 39 |                          |     | Page numbers where the relevant information can be found : page 14                        |   |
| 40 | Generalisability         | 21  | Discuss the generalisability (external validity) of the study results                     | √ |
| 41 |                          |     | Page numbers where the relevant information can be found : page 17                        |   |
| 42 | <b>Other information</b> |     |                                                                                           | √ |
| 43 | Funding                  | 22  | Give the source of funding and the role of the funders for the present study and, if      | √ |
| 44 |                          |     | applicable, for the original study on which the present article is based                  |   |
| 45 |                          |     | Page numbers where the relevant information can be found : page 22                        |   |

\*Give information separately for exposed and unexposed groups.

1 **Note:** An Explanation and Elaboration article discusses each checklist item and gives methodological background and  
2 published examples of transparent reporting. The STROBE checklist is best used in conjunction with this article (freely  
3 available on the Web sites of PLoS Medicine at <http://www.plosmedicine.org/>, Annals of Internal Medicine at  
4 <http://www.annals.org/>, and Epidemiology at <http://www.epidem.com/>). Information on the STROBE Initiative is  
5 available at <http://www.strobe-statement.org>.  
6  
7  
8  
9  
10  
11  
12  
13  
14  
15  
16  
17  
18  
19  
20  
21  
22  
23  
24  
25  
26  
27  
28  
29  
30  
31  
32  
33  
34  
35  
36  
37  
38  
39  
40  
41  
42  
43  
44  
45  
46  
47  
48  
49  
50  
51  
52  
53  
54  
55  
56  
57  
58  
59  
60

For peer review only
