# Supplementary material for: Effect of large-scale disasters on bystander-initiated cardiopulmonary resuscitation in family-witnessed, friend-witnessed and colleague-witnessed out-of-hospital cardiac arrest: a retrospective analysis of prospectively collected, nationwide, population-based data
Source: PubMed Central journal article supplement — BMJ Open. 2022 Feb 1;12(2):e055640. doi: 10.1136/bmjopen-2021-055640 (PMC8808444; doi:10.1136/bmjopen-2021-055640), 2022-02-01
Supplement: bmjopen-2021-055640supp002.pdf [file bmjopen-2021-055640supp002.pdf]

**Supplemental Table 1** Background, characteristics, and time factors of family- and friend/colleague-witnessed out-of-hospital cardiac arrest cases in non-affected prefectures

| Background, characteristics, and time factors      | Impact phase     |                        | Unadjusted OR (95% CI) <sup>a)</sup> or P-value | Postimpact phase  |                        | Unadjusted OR (95% CI) <sup>a)</sup> or P-value |
|----------------------------------------------------|------------------|------------------------|-------------------------------------------------|-------------------|------------------------|-------------------------------------------------|
|                                                    | 2011 (N = 9,696) | 2010/2012 (N = 17,985) |                                                 | 2011 (N = 14,024) | 2010/2012 (N = 26,899) |                                                 |
| Family-witnessed patients, No. (%)                 | 8,771 (90.5)     | 16,211 (90.1)          | 1.04 (0.95–1.13)                                | 12,679 (90.4)     | 24,452 (90.9)          | 0.94 (0.88–1.01)                                |
| Time (7:00 a.m.–7:00 p.m.), No. (%)                | 5,741 (59.2)     | 10,653 (59.2)          | 1.00 (0.95–1.05)                                | 8,285 (59.1)      | 16,124 (59.9)          | 0.97 (0.93–1.01)                                |
| Gender, No. (%)                                    | 1,362 (14.1)     | 2,424 (13.5)           | 1.05 (0.98–1.13)                                | 1,971 (14.1)      | 3,659 (13.6)           | 1.04 (0.98–1.10)                                |
| Age, median (IQR), y                               | 77 (66–85)       | 77 (66–85)             | 0.57                                            | 77 (66–85)        | 78 (67–85)             | 0.05                                            |
| Occupation, No. (%)                                | 6,113 (63.1)     | 11,429 (63.6)          | 0.98 (0.93–1.03)                                | 8,846 (63.1)      | 16,795 (62.4)          | 1.03 (0.99–1.07)                                |
| Known cardiac etiology, No. (%)                    | 5,661 (58.4)     | 10,483 (58.3)          | 1.00 (0.96–1.06)                                | 8,220 (58.6)      | 16,085 (59.8)          | <b>0.95 (0.91–0.99)</b>                         |
| Non-cardiac origin <sup>b)</sup> , No. (%)         | 1,232 (12.7)     | 2,202 (12.2)           | 1.04 (0.97–1.12)                                | 1,709 (12.2)      | 2,845 (10.6)           | <b>1.17 (1.10–1.25)</b>                         |
| Stable initial rhythm, No. (%)                     | 1,399 (14.4)     | 2,598 (14.5)           | 1.00 (0.93–1.07)                                | 1,979 (14.1)      | 3,676 (13.7)           | 1.04 (0.98–1.10)                                |
| Resuscitation by bystanders with an AED, No. (%)   | 4,882 (50.4)     | 8,833 (49.1)           | 1.05 (1.00–1.10)                                | 7,139 (50.9)      | 13,640 (50.7)          | 1.01 (0.97–1.05)                                |
| Resuscitation by bystanders with an AED, No. (%)   | 67 (0.7)         | 145 (0.8)              | 0.60 (0.64–1.15)                                | 101 (0.7)         | 197 (0.8)              | 0.91 (0.72–1.16)                                |
| Epinephrine administration by paramedics, No. (%)  | 2,097 (21.6)     | 3,891 (21.6)           | 1.00 (0.94–1.06)                                | 3,084 (22.0)      | 6,106 (23.5)           | <b>0.92 (0.88–0.97)</b>                         |
| Endotracheal intubation by paramedics, No. (%)     | 845 (8.7)        | 1,697 (9.4)            | <b>0.92 (0.84–0.99)</b>                         | 1,246 (8.9)       | 2,500 (9.3)            | 0.95 (0.89–1.02)                                |
| Response intervals, median (IQR), min              |                  |                        |                                                 |                   |                        |                                                 |
| Dispatch-to-emergency call                         | 2 (0–5)          | 2 (0–5)                | <b>&lt;0.005</b>                                | 2 (0–5)           | 2 (0–5)                | 0.24                                            |
| EMS response time <sup>c)</sup>                    | 8 (7–11)         | 8 (7–10)               | 0.10                                            | 8 (7–11)          | 8 (7–11)               | 0.86                                            |
| Interval at the patient-to-arrival at the hospital | 23 (18–30)       | 23 (18–30)             | 0.08                                            | 23 (18–30)        | 24 (18–31)             | <b>&lt;0.01</b>                                 |

IQR, interquartile range; CPR, cardiopulmonary resuscitation; AED, automated external defibrillator; EMS, emergency medical service;

Impact phase, 0–23 weeks from March 11; postimpact phase, from 24 weeks after March 11 until March 11 of the following year;

OR, odds ratio; CI, confidence interval.

a) 2010/2012 as a reference

b) Asphyxia, submersion, hypothermia, poisoning, and trauma

c) Time interval between emergency call and EMS arrival at patient

**Supplemental Table 2** Phasic comparisons of bystander cardiopulmonary resuscitation and outcomes between 2011 and 2010/2012 in non-affected prefectures

| Background and outcomes | Impact phase     |                        | Adjusted OR (95% CI) with 2010/2012 as a reference | Postimpact phase  |                        | Adjusted OR (95% CI) with 2010/2012 as a reference |
|-------------------------|------------------|------------------------|----------------------------------------------------|-------------------|------------------------|----------------------------------------------------|
|                         | 2011 (N = 9,696) | 2010/2012 (N = 17,985) |                                                    | 2011 (N = 14,024) | 2010/2012 (N = 26,899) |                                                    |

|                                     |              |              |                                |              |               |                  |
|-------------------------------------|--------------|--------------|--------------------------------|--------------|---------------|------------------|
| rate, No. (%)                       | 3,907 (40.3) | 7,263 (40.4) | 0.96 (0.91–1.02) <sup>a)</sup> | 5,801 (41.4) | 11,059 (41.1) | 1.01 (0.96–1.0)  |
| n survival, No. (%)                 | 805 (8.3)    | 1,509 (8.4)  | 1.00 (0.91–1.10)               | 1,146 (8.2)  | 2,120 (7.9)   | 1.02 (0.94–1.10) |
| ogically favorable outcome, No. (%) | 413 (4.3)    | 735 (4.1)    | 1.07 (0.93–1.22) <sup>b)</sup> | 557 (4.0)    | 1,056 (3.9)   | 1.01 (0.90–1.13) |

BCPR, bystander cardiopulmonary resuscitation; impact phase, 0-23 weeks from March 11;

postimpact phase, from 24 weeks after March 11 until March 11 of the following year; OR, odds ratio; CI, confidence interval.

a) Among the other factors including in the logistic regression model, age (adjusted OR; 95% CI, 0.94; 0.92–0.95/10 years), family bystander (0.50; 0.45–0.55), cardiac etiology (1.1; 1.03–1.17), and DA-CPR provision (8.60; 8.12–9.11) were significantly associated with BCPR rate.

b) Among the other factors including in the logistic regression model, age (0.93; 0.92–0.95/10 years), family bystander (0.50; 0.46–0.55), cardiac etiology (1.1; 1.04–1.15), and DA-CPR provision (8.99; 8.57–9.42) were significantly associated with BCPR rate.

**Supplemental Table 3** Phasic comparisons of indices for dispatcher-assisted and bystander-initiated resuscitation efforts between 2011 and 2010/2012 in non-affected prefectures

| related to DA-CPR and                    | Impact phase       |                     | Unadjusted OR<br>(95% CI) with<br>2010/2012 as a<br>reference | Postimpact phase    |                      | Unadjusted OR<br>(95% CI)<br>2010/2012<br>referen |
|------------------------------------------|--------------------|---------------------|---------------------------------------------------------------|---------------------|----------------------|---------------------------------------------------|
|                                          | 2011               | 2010/2012           |                                                               | 2011                | 2010/2012            |                                                   |
| sensitivity, No./total                   | 4,882/8,834 (55.3) | 8,833/16,350 (54.0) | 1.05 (0.99–1.11)                                              | 7,139/12,788 (55.8) | 13,640/24,565 (55.5) | 1.05 (0.99–1.11)                                  |
| er's compliance to DA-<br>No./total (%)  | 3,041/4,882 (62.3) | 5,628/8,833 (63.7)  | 0.94 (0.88–1.01)                                              | 8,725/13,640 (63.9) | 8,725/13,640 (64.0)  | 1.00 (0.94–1.06)                                  |
| er's own performance of<br>No./total (%) | 862/4,814 (17.9)   | 1,635/9,152 (17.9)  | 1.00 (0.92–1.10)                                              | 1,236/6,885 (18.0)  | 2,334/13,259 (17.6)  | 1.02 (0.95–1.09)                                  |

DA-CPR, dispatcher-assisted cardiopulmonary resuscitation; BCPR, bystander cardiopulmonary resuscitation; impact phase, 0-23 weeks from March 11; postimpact phase, from 24 weeks after March 11 until March 11 of the following year; OR, odds ratio; CI, confidence interval.
