# Supplementary figures and images for: Effect of large-scale disasters on bystander-initiated cardiopulmonary resuscitation in family-witnessed, friend-witnessed and colleague-witnessed out-of-hospital cardiac arrest: a retrospective analysis of prospectively collected, nationwide, population-based data
Source: PubMed Central journal article supplement — BMJ Open. 2022 Feb 1;12(2):e055640. doi: 10.1136/bmjopen-2021-055640 (PMC8808444; doi:10.1136/bmjopen-2021-055640), 2022-02-01

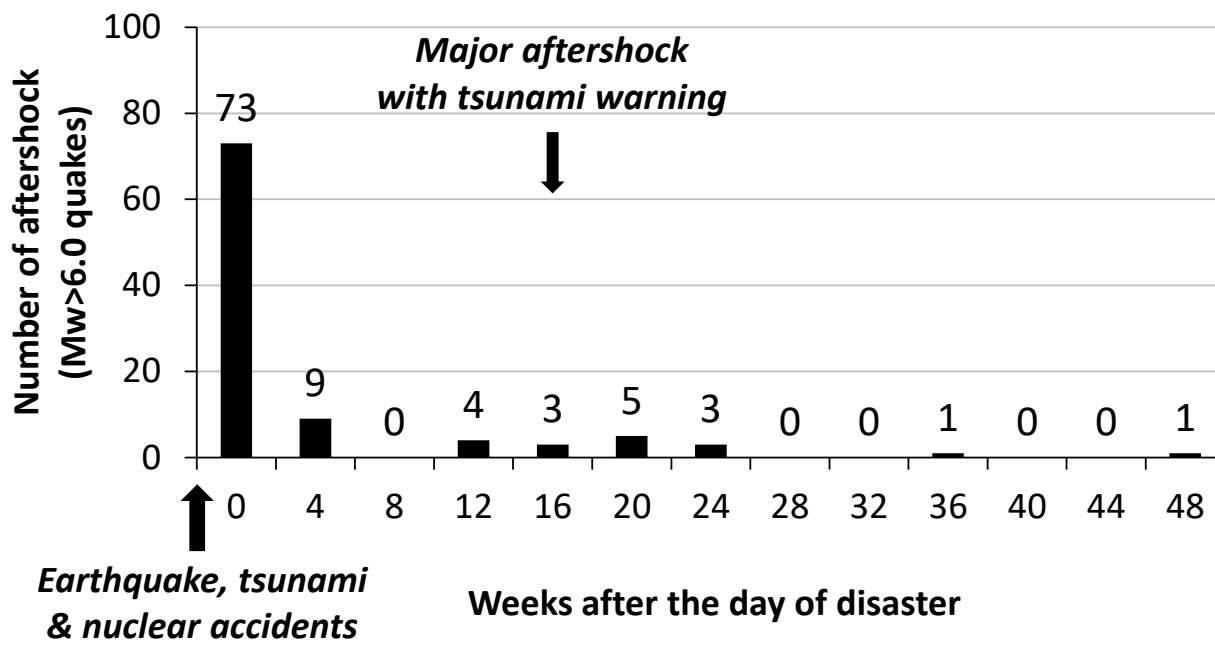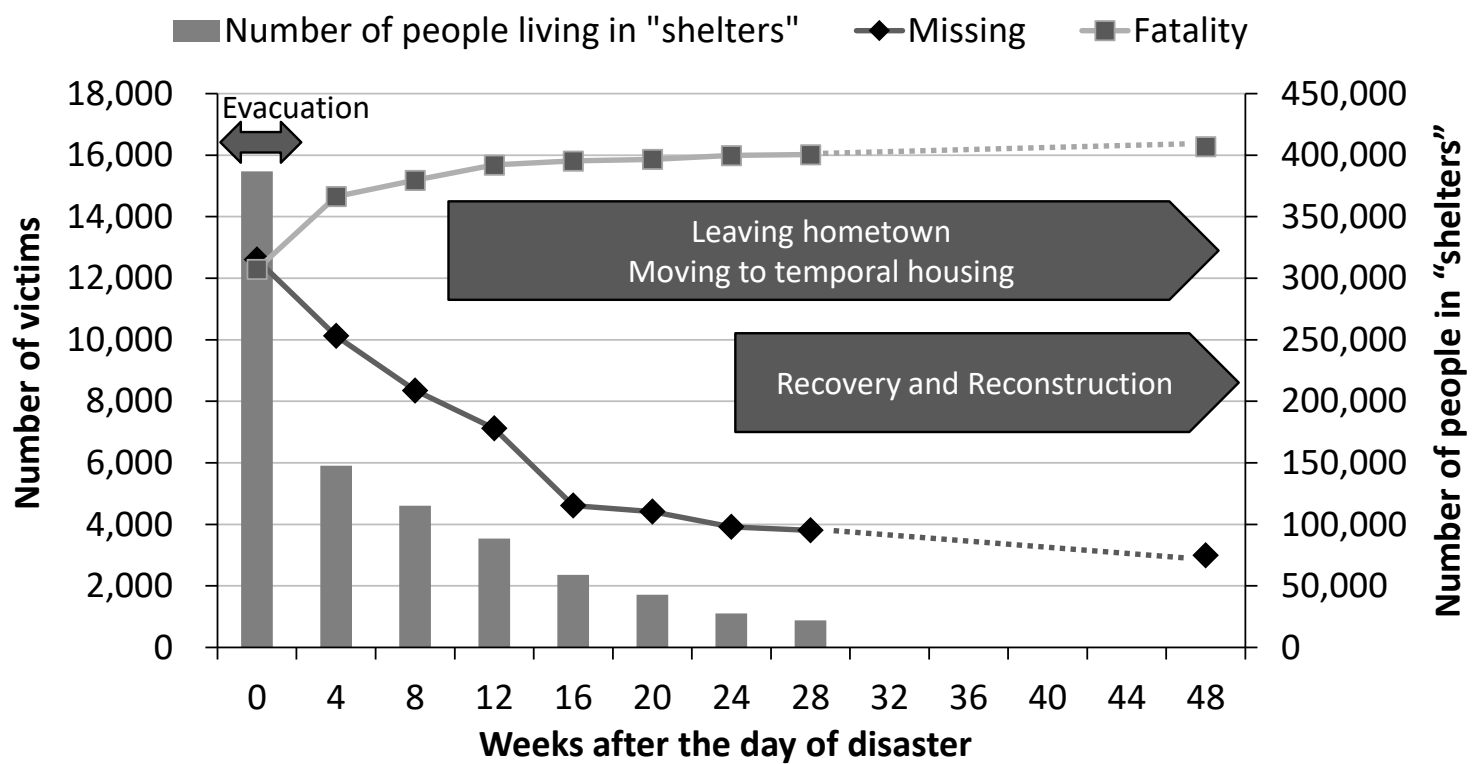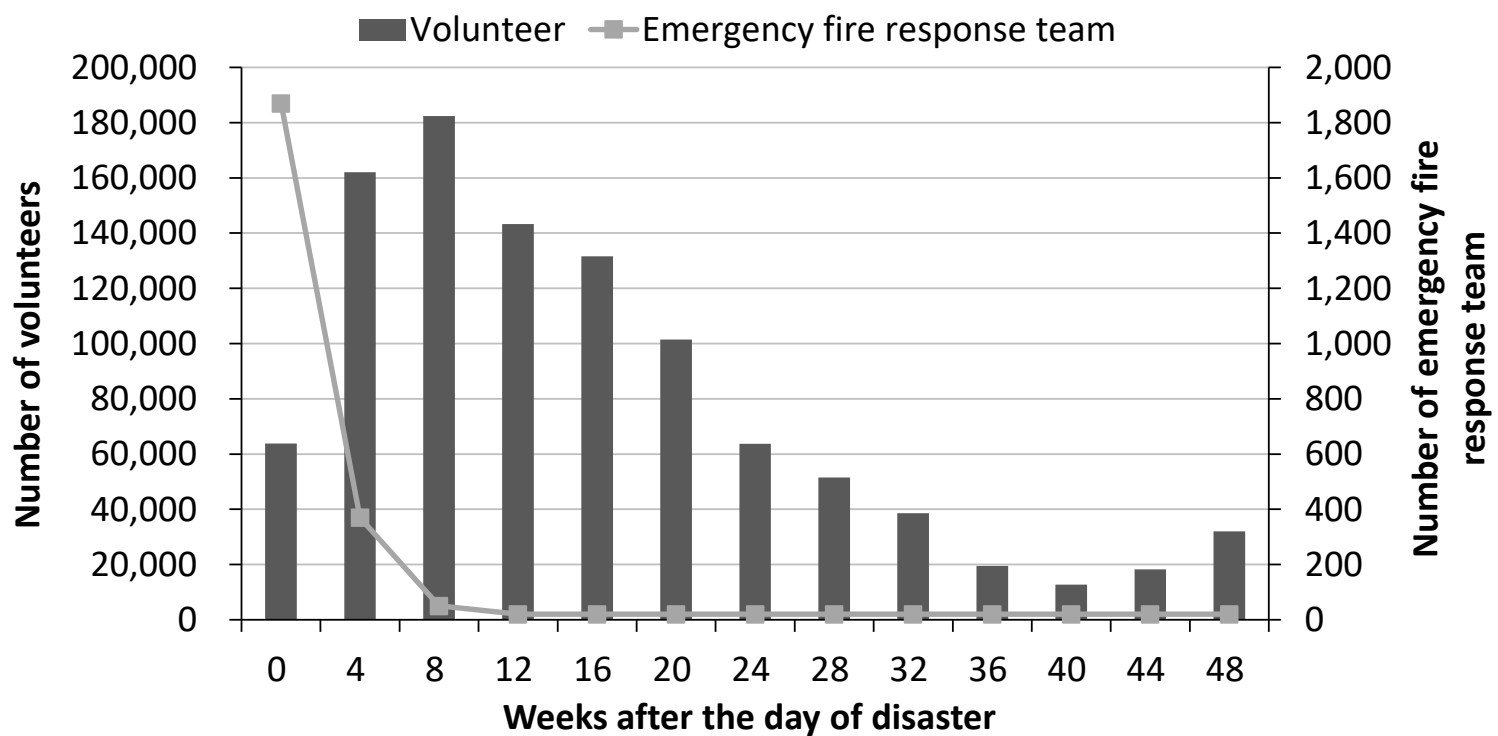

Supplement: bmjopen-2021-055640supp001.pdf [file bmjopen-2021-055640supp001.pdf]
